# Supplementary material for: Experimental thermodynamic study of the “high-entropy” oxide (MgCoNiCuZn) 0.2 O: entropic stabilization confirmed, but is it all that matters?
Source: Royal Society of Chemistry journal article supplement (doi:10.1039/d5ta07832f), 2025-12-23
Supplement: d5ta07832f2.xlsx [file d5ta07832f2.xlsx]

## Sheet: description
This is a supplementary to 'Experimental thermodynamic study of the “high-entropy” oxide (MgCoNiCuZn)0.2O: entropic stabilization confirmed, but is it all that matters?' by Vladimir V. Sereda, Dmitry S. Tsvetkov, Anna V. Sereda, Dmitry A. Malyshkin, Irina A. Bajenova, Ivan L. Ivanov, Andrey Yu. Zuev
This workbook contains two worksheets with the thermodynamic data for (MgCoNiCuZn)0.2O:
experimental Cp and H data	The experimental data to which the smoothed heat capacity function was fitted (see Eq. 3 and Table 2 in the text). Except for the relaxation calorimetry (Zhang et al. https://doi.org/10.1021/acs.chemmater.9b00624 and Jimenez-Segura et al. https://doi.org/10.1063/1.5091787), the data were obtained in this study. The data columns are similar to those used in the Cpfit software (see https://doi.org/…
tabulated functions	The values of Cp(J/K), H(J), G(J), S(J/K), and H-H298(J) calculated using the smoothed heat capacity functions (see Eq. 3 and Table 2 in the text, Eq. S1 and Table S3 in Supplementary) and the enthalpy of formation (see Table 4 in the text). The data columns are similar to those generated by the FactSage software (https://doi.org/10.1016/j.calphad.2016.05.002)
Thermodynamic data correspond to the standard conditions (the absolute pressure of (100 ± 3) kPa)
The relative expanded standard uncertainties (≈95% confidence level) are believed to be up to 1% for Cp and S above 80 K, up to 0.5% for H in the whole temperature range, and up to 3% and Cp and S below 80 K

## Sheet: experimental Cp and H data
Type	T1	T2	Y	W	Series	Ycalc
either "Cp" for the heat capacity or "H" for the enthalpy increments	Low temperature in the drop calorimetry, in K	Either temperature to which Cp refers or the high temperature in the drop calorimetry, in K	Measured value (heat capacity in J/mol/K or enthalpy increment in J/mol)	Weight used in the fitting (see Eq. 2 in the text)	Data source / measurement series	Calculated value (with the smoothed heat capacity function, see Eq. 3 and Table 2 in the text), in J/mol/K or J/mol
Cp		4.08343	0.01272	2.14493	Zhang et al.	0.00288376
Cp		7.07702	0.04656	2.14493	Zhang et al.	0.0150119
Cp		10.0704	0.0486	2.14493	Zhang et al.	0.0432532
Cp		13.0641	0.10555	2.14493	Zhang et al.	0.0944335
Cp		16.058	0.16828	2.14493	Zhang et al.	0.175369
Cp		19.052	0.26175	2.14493	Zhang et al.	0.29288
Cp		22.0464	0.3909	2.14493	Zhang et al.	0.453694
Cp		25.0411	0.56308	2.14493	Zhang et al.	0.664149
Cp		28.0365	0.82008	2.14493	Zhang et al.	0.929598
Cp		31.032	1.09311	2.14493	Zhang et al.	1.25356
Cp		34.0285	1.48068	2.14493	Zhang et al.	1.63736
Cp		37.0259	1.98821	2.14493	Zhang et al.	2.07988
Cp		40.0232	2.47166	2.14493	Zhang et al.	2.57764
Cp		43.0205	2.96916	2.14493	Zhang et al.	3.1259
Cp		46.0187	3.5762	2.14493	Zhang et al.	3.71916
Cp		49.0171	4.20211	2.14493	Zhang et al.	4.35144
Cp		52.0152	4.79257	2.14493	Zhang et al.	5.01693
Cp		55.014	5.46766	2.14493	Zhang et al.	5.71061
Cp		58.0135	6.2363	2.14493	Zhang et al.	6.42783
Cp		61.0125	6.93134	2.14493	Zhang et al.	7.16417
Cp		64.0119	7.69185	2.14493	Zhang et al.	7.91632
Cp		67.0113	8.44486	2.14493	Zhang et al.	8.681
Cp		70.0109	9.2183	2.14493	Zhang et al.	9.45555
Cp		73.0105	9.99132	2.14493	Zhang et al.	10.2374
Cp		76.0108	10.8562	2.14493	Zhang et al.	11.0247
Cp		79.0108	11.6774	1.33333	Zhang et al.	11.8149
Cp		82.0105	12.4688	1.33333	Zhang et al.	12.6063
Cp		85.0105	13.2896	1.33333	Zhang et al.	13.3972
Cp		88.0104	14.1127	1.33333	Zhang et al.	14.186
Cp		91.0103	14.9266	1.33333	Zhang et al.	14.971
Cp		94.0098	15.6887	1.33333	Zhang et al.	15.751
Cp		97.0096	16.4915	1.33333	Zhang et al.	16.5246
Cp		100.009	17.2794	1.33333	Zhang et al.	17.2908
Cp		103.009	18.0531	1.33333	Zhang et al.	18.0483
Cp		106.008	18.8123	1.33333	Zhang et al.	18.7964
Cp		109.007	19.5166	1.33333	Zhang et al.	19.534
Cp		112.006	20.2094	1.33333	Zhang et al.	20.2605
Cp		115.005	20.9281	1.54167	Zhang et al.	20.9754
Cp		118.004	21.6064	1.54167	Zhang et al.	21.678
Cp		121.003	22.2934	1.54167	Zhang et al.	22.368
Cp		124.002	22.9601	1.54167	Zhang et al.	23.045
Cp		127	23.5922	1.54167	Zhang et al.	23.7087
Cp		129.999	24.2185	1.54167	Zhang et al.	24.359
Cp		132.997	24.8014	1.54167	Zhang et al.	24.9956
Cp		135.994	25.341	1.54167	Zhang et al.	25.6186
Cp		145.374	27.1794	1.54167	Zhang et al.	27.4799
Cp		154.124	28.7081	0	Zhang et al.	29.0981
Cp		162.632	30.1802	0	Zhang et al.	30.5658
Cp		171.38	31.5388	0	Zhang et al.	31.9721
Cp		180.128	32.7839	0	Zhang et al.	33.2798
Cp		188.633	33.9157	0	Zhang et al.	34.4629
Cp		197.136	34.9908	0	Zhang et al.	35.565
Cp		5.88769	0.01078	2.14493	Jimenez-Segura et al.	0.00864405
Cp		9.50185	0.09389	2.14493	Jimenez-Segura et al.	0.0363336
Cp		13.116	0.20817	2.14493	Jimenez-Segura et al.	0.0955628
Cp		16.7302	0.26011	2.14493	Jimenez-Segura et al.	0.198327
Cp		20.3443	0.364	2.14493	Jimenez-Segura et al.	0.356588
Cp		23.9585	0.56658	2.14493	Jimenez-Segura et al.	0.581974
Cp		27.5726	0.85747	2.14493	Jimenez-Segura et al.	0.884726
Cp		31.1868	1.24705	2.14493	Jimenez-Segura et al.	1.27192
Cp		34.801	1.73532	2.14493	Jimenez-Segura et al.	1.7459
Cp		38.4151	2.26745	2.14493	Jimenez-Segura et al.	2.30398
Cp		42.0293	2.96119	2.14493	Jimenez-Segura et al.	2.93934
Cp		45.6434	3.65205	2.14493	Jimenez-Segura et al.	3.64265
Cp		49.2576	4.3993	2.14493	Jimenez-Segura et al.	4.40366
Cp		52.8717	5.22595	2.14493	Jimenez-Segura et al.	5.21242
Cp		56.4859	6.07857	2.14493	Jimenez-Segura et al.	6.05991
Cp		60.1001	6.9707	2.14493	Jimenez-Segura et al.	6.93833
Cp		63.4561	7.845	2.14493	Jimenez-Segura et al.	7.77589
Cp		66.5539	8.56161	2.14493	Jimenez-Segura et al.	8.56368
Cp		69.9099	9.46456	2.14493	Jimenez-Segura et al.	9.42933
Cp		73.5241	10.4359	2.14493	Jimenez-Segura et al.	10.3719
Cp		76.6219	11.1808	2.14493	Jimenez-Segura et al.	11.1854
Cp		79.7198	12.0098	1.33333	Jimenez-Segura et al.	12.0019
Cp		83.3339	12.9799	1.33333	Jimenez-Segura et al.	12.9553
Cp		86.9481	13.8296	1.33333	Jimenez-Segura et al.	13.907
Cp		90.5622	14.8231	1.33333	Jimenez-Segura et al.	14.8541
Cp		93.9183	15.6671	1.33333	Jimenez-Segura et al.	15.7272
Cp		97.2742	16.5082	1.33333	Jimenez-Segura et al.	16.5925
Cp		100.888	17.4483	1.33333	Jimenez-Segura et al.	17.5137
Cp		104.503	18.2846	1.33333	Jimenez-Segura et al.	18.4221
Cp		108.117	19.2456	1.33333	Jimenez-Segura et al.	19.316
Cp		111.731	20.0663	1.33333	Jimenez-Segura et al.	20.1942
Cp		115.345	21.0117	1.54167	Jimenez-Segura et al.	21.0556
Cp		118.959	21.8064	1.54167	Jimenez-Segura et al.	21.8991
Cp		122.573	22.6531	1.54167	Jimenez-Segura et al.	22.7241
Cp		126.188	23.5414	1.54167	Jimenez-Segura et al.	23.5301
Cp		129.802	24.2426	1.54167	Jimenez-Segura et al.	24.3167
Cp		133.416	24.9958	1.54167	Jimenez-Segura et al.	25.0835
Cp		137.03	25.7282	1.54167	Jimenez-Segura et al.	25.8306
Cp		140.644	26.4346	1.54167	Jimenez-Segura et al.	26.5579
Cp		144.258	27.1255	1.54167	Jimenez-Segura et al.	27.2654
Cp		147.872	27.7955	1.54167	Jimenez-Segura et al.	27.9534
Cp		151.487	28.45	0	Jimenez-Segura et al.	28.6221
Cp		155.101	29.063	0	Jimenez-Segura et al.	29.2717
Cp		158.715	29.6603	0	Jimenez-Segura et al.	29.9027
Cp		162.329	30.2213	0	Jimenez-Segura et al.	30.5154
Cp		165.943	30.7927	0	Jimenez-Segura et al.	31.1101
Cp		169.557	31.3277	0	Jimenez-Segura et al.	31.6874
Cp		173.172	31.8576	0	Jimenez-Segura et al.	32.2477
Cp		176.786	32.3562	0	Jimenez-Segura et al.	32.7914
Cp		180.4	32.9432	0	Jimenez-Segura et al.	33.3189
Cp		184.014	33.4315	0	Jimenez-Segura et al.	33.8308
Cp		187.628	33.8782	0	Jimenez-Segura et al.	34.3275
Cp		191.242	34.3561	0	Jimenez-Segura et al.	34.8095
Cp		194.857	34.8132	0	Jimenez-Segura et al.	35.2771
Cp		198.471	35.2287	0	Jimenez-Segura et al.	35.731
Cp		202.085	35.6598	0	Jimenez-Segura et al.	36.1715
Cp		205.699	36.0858	0	Jimenez-Segura et al.	36.599
Cp		209.313	36.4754	0	Jimenez-Segura et al.	37.0139
Cp		212.927	36.8026	0	Jimenez-Segura et al.	37.4167
Cp		216.541	37.1506	0	Jimenez-Segura et al.	37.8078
Cp		220.156	37.561	0	Jimenez-Segura et al.	38.1876
Cp		223.77	37.935	0	Jimenez-Segura et al.	38.5563
Cp		227.384	38.2986	0	Jimenez-Segura et al.	38.9145
Cp		230.998	38.6882	0	Jimenez-Segura et al.	39.2624
Cp		234.612	38.9687	0	Jimenez-Segura et al.	39.6004
Cp		238.226	39.1972	0	Jimenez-Segura et al.	39.9289
Cp		241.841	39.4725	0	Jimenez-Segura et al.	40.248
Cp		245.455	39.8154	0	Jimenez-Segura et al.	40.5583
Cp		249.069	40.0595	0	Jimenez-Segura et al.	40.8598
Cp		252.683	40.3192	0	Jimenez-Segura et al.	41.153
Cp		256.297	40.5997	0	Jimenez-Segura et al.	41.4381
Cp		259.911	40.8231	0	Jimenez-Segura et al.	41.7154
Cp		263.525	40.9997	0	Jimenez-Segura et al.	41.9851
Cp		267.14	41.2178	0	Jimenez-Segura et al.	42.2475
Cp		270.754	41.4568	0	Jimenez-Segura et al.	42.5028
Cp		274.368	41.6957	0	Jimenez-Segura et al.	42.7513
Cp		277.982	41.8983	0	Jimenez-Segura et al.	42.9931
Cp		281.596	42.1009	0	Jimenez-Segura et al.	43.2286
Cp		285.21	42.3294	0	Jimenez-Segura et al.	43.4578
Cp		288.825	42.4957	0	Jimenez-Segura et al.	43.681
Cp		292.439	42.7086	0	Jimenez-Segura et al.	43.8984
Cp		296.053	42.8489	0	Jimenez-Segura et al.	44.1102
Cp		299.667	43.0878	0	Jimenez-Segura et al.	44.3165
Cp		302.765	43.3018	0	Jimenez-Segura et al.	44.4891
Cp		81.3065	12.313	4	adiabatic 1	12.4205
Cp		83.1984	13.0625	4	adiabatic 1	12.9196
Cp		85.1425	12.9151	4	adiabatic 1	13.432
Cp		86.8365	13.9297	4	adiabatic 1	13.8777
Cp		88.5666	14.3961	4	adiabatic 1	14.3318
Cp		90.4992	14.9078	4	adiabatic 1	14.8376
Cp		92.4321	15.4199	4	adiabatic 1	15.3414
Cp		94.3632	15.9257	4	adiabatic 1	15.8425
Cp		96.2955	16.4193	4	adiabatic 1	16.3411
Cp		98.2308	16.9386	4	adiabatic 1	16.8375
Cp		100.167	17.4402	4	adiabatic 1	17.3309
Cp		102.56	18.0507	4	adiabatic 1	17.9356
Cp		105.438	18.7917	4	adiabatic 1	18.655
Cp		108.319	19.5125	4	adiabatic 1	19.3655
Cp		111.204	20.2027	4	adiabatic 1	20.0671
Cp		114.091	20.8971	4.625	adiabatic 1	20.7586
Cp		116.982	21.5433	4.625	adiabatic 1	21.44
Cp		119.876	22.1962	4.625	adiabatic 1	22.1102
Cp		122.778	22.8452	4.625	adiabatic 1	22.7702
Cp		125.679	23.469	4.625	adiabatic 1	23.4178
Cp		128.574	24.1069	4.625	adiabatic 1	24.0517
Cp		131.472	24.7011	4.625	adiabatic 1	24.6735
Cp		134.37	25.2946	4.625	adiabatic 1	25.2828
Cp		137.267	25.8982	4.625	adiabatic 1	25.879
Cp		140.163	26.4605	4.625	adiabatic 1	26.4623
Cp		143.061	27.0323	4.625	adiabatic 1	27.0332
Cp		145.958	27.593	4.625	adiabatic 1	27.5914
Cp		148.854	28.1254	4.625	adiabatic 1	28.1369
Cp		152.183	28.7571	16.4444	adiabatic 1	28.7488
Cp		156.045	29.4305	16.4444	adiabatic 1	29.4384
Cp		159.914	30.1097	16.4444	adiabatic 1	30.108
Cp		163.781	30.757	16.4444	adiabatic 1	30.7565
Cp		167.639	31.4055	16.4444	adiabatic 1	31.3831
Cp		171.497	32.0064	16.4444	adiabatic 1	31.9902
Cp		175.354	32.6063	16.4444	adiabatic 1	32.5779
Cp		179.209	33.1752	16.4444	adiabatic 1	33.1469
Cp		183.064	33.7398	16.4444	adiabatic 1	33.6977
Cp		186.915	34.2629	4.625	adiabatic 1	34.2306
Cp		190.763	34.7961	4.625	adiabatic 1	34.7463
Cp		194.609	35.2904	4.625	adiabatic 1	35.2455
Cp		198.452	35.7803	4.625	adiabatic 1	35.7286
Cp		202.317	36.2761	4.625	adiabatic 1	36.1993
Cp		206.209	36.7052	4.625	adiabatic 1	36.6583
Cp		210.101	37.1548	4.625	adiabatic 1	37.1027
Cp		213.988	37.5803	4.625	adiabatic 1	37.5327
Cp		217.863	38.0086	4.625	adiabatic 1	37.948
Cp		221.733	38.3995	4.625	adiabatic 1	38.3499
Cp		225.604	38.7998	2.90196	adiabatic 1	38.7394
Cp		229.46	39.1766	2.90196	adiabatic 1	39.1156
Cp		233.31	39.5476	2.90196	adiabatic 1	39.4798
Cp		237.159	39.8992	2.90196	adiabatic 1	39.8329
Cp		240.994	40.2376	2.90196	adiabatic 1	40.1741
Cp		244.818	40.5612	2.90196	adiabatic 1	40.5043
Cp		248.64	40.8952	2.90196	adiabatic 1	40.8245
Cp		252.444	41.191	2.90196	adiabatic 1	41.1339
Cp		256.237	41.4989	2.90196	adiabatic 1	41.4335
Cp		260.026	41.789	2.50847	adiabatic 1	41.7241
Cp		263.794	42.063	2.50847	adiabatic 1	42.0049
Cp		267.549	42.3335	2.50847	adiabatic 1	42.2768
Cp		271.296	42.5944	2.50847	adiabatic 1	42.5405
Cp		275.029	42.8492	2.50847	adiabatic 1	42.796
Cp		278.738	43.0868	2.50847	adiabatic 1	43.0429
Cp		282.43	43.3228	2.50847	adiabatic 1	43.282
Cp		286.11	43.5451	2.50847	adiabatic 1	43.5139
Cp		289.763	43.7594	2.50847	adiabatic 1	43.738
Cp		293.399	43.9628	2.50847	adiabatic 1	43.9552
Cp		297.02	44.1508	2	adiabatic 1	44.1659
Cp		300.614	44.3518	2	adiabatic 1	44.3697
Cp		304.184	44.5308	2	adiabatic 1	44.5669
Cp		307.737	44.7133	2	adiabatic 1	44.7584
Cp		311.262	44.9026	2	adiabatic 1	44.9436
Cp		314.767	45.0625	2	adiabatic 1	45.1233
Cp		318.258	45.2267	2	adiabatic 1	45.2979
Cp		321.718	45.4088	2	adiabatic 1	45.4669
Cp		325.159	45.5568	2	adiabatic 1	45.6309
Cp		328.584	45.74	2	adiabatic 1	45.7904
Cp		331.722	45.8682	3.7	adiabatic 1	45.9333
Cp		335.236	46.0896	3.7	adiabatic 1	46.0897
Cp		338.736	46.3617	3.7	adiabatic 1	46.2419
Cp		342.253	46.4592	3.7	adiabatic 1	46.3912
Cp		345.771	46.538	3.7	adiabatic 1	46.5371
Cp		202.893	36.207	4.625	adiabatic 2	36.2681
Cp		203.409	36.2931	4.625	adiabatic 2	36.3296
Cp		204.331	36.3732	4.625	adiabatic 2	36.4387
Cp		205.265	36.4841	4.625	adiabatic 2	36.5483
Cp		206.197	36.5932	4.625	adiabatic 2	36.6569
Cp		207.125	36.7087	4.625	adiabatic 2	36.7642
Cp		208.053	36.7703	4.625	adiabatic 2	36.8706
Cp		208.98	36.8483	4.625	adiabatic 2	36.9762
Cp		209.904	37.0199	4.625	adiabatic 2	37.0806
Cp		210.828	37.1255	4.625	adiabatic 2	37.1842
Cp		211.749	37.2262	4.625	adiabatic 2	37.2867
Cp		212.668	37.3079	4.625	adiabatic 2	37.3882
Cp		213.588	37.4106	4.625	adiabatic 2	37.489
Cp		214.505	37.5159	4.625	adiabatic 2	37.5889
Cp		215.422	37.588	4.625	adiabatic 2	37.6879
Cp		216.334	37.7218	4.625	adiabatic 2	37.7857
Cp		217.246	37.7904	4.625	adiabatic 2	37.8828
Cp		218.157	37.9069	4.625	adiabatic 2	37.979
Cp		219.067	37.9744	4.625	adiabatic 2	38.0744
Cp		219.974	38.0703	4.625	adiabatic 2	38.1688
Cp		220.878	38.1291	4.625	adiabatic 2	38.2622
Cp		221.78	38.2395	4.625	adiabatic 2	38.3547
Cp		222.681	38.3282	2.90196	adiabatic 2	38.4464
Cp		223.581	38.4381	2.90196	adiabatic 2	38.5373
Cp		224.479	38.587	2.90196	adiabatic 2	38.6275
Cp		225.377	38.6294	2.90196	adiabatic 2	38.7169
Cp		226.271	38.672	2.90196	adiabatic 2	38.8053
Cp		227.163	38.7644	2.90196	adiabatic 2	38.8929
Cp		228.054	38.838	2.90196	adiabatic 2	38.9798
Cp		228.943	38.9785	2.90196	adiabatic 2	39.0658
Cp		229.831	39.0474	2.90196	adiabatic 2	39.1512
Cp		230.715	39.0921	2.90196	adiabatic 2	39.2355
Cp		231.597	39.2349	2.90196	adiabatic 2	39.3191
Cp		232.479	39.3165	2.90196	adiabatic 2	39.4021
Cp		233.358	39.3731	2.90196	adiabatic 2	39.4842
Cp		234.236	39.4552	2.90196	adiabatic 2	39.5657
Cp		235.11	39.4927	2.90196	adiabatic 2	39.6463
Cp		235.982	39.5701	2.90196	adiabatic 2	39.726
Cp		236.854	39.6531	2.90196	adiabatic 2	39.8052
Cp		237.723	39.7088	2.90196	adiabatic 2	39.8837
Cp		238.59	39.822	2.90196	adiabatic 2	39.9614
Cp		239.456	39.8714	2.90196	adiabatic 2	40.0384
Cp		240.316	39.9499	2.90196	adiabatic 2	40.1145
Cp		241.175	40.0146	2.90196	adiabatic 2	40.19
Cp		242.034	40.1376	2.90196	adiabatic 2	40.2648
Cp		242.89	40.1718	2.90196	adiabatic 2	40.339
Cp		243.744	40.2573	2.90196	adiabatic 2	40.4125
Cp		244.594	40.3068	2.90196	adiabatic 2	40.4852
Cp		245.442	40.3865	2.90196	adiabatic 2	40.5572
Cp		246.289	40.4224	2.90196	adiabatic 2	40.6286
Cp		247.133	40.4577	2.90196	adiabatic 2	40.6994
Cp		247.974	40.5686	2.90196	adiabatic 2	40.7694
Cp		248.812	40.6352	2.90196	adiabatic 2	40.8387
Cp		249.647	40.7419	2.90196	adiabatic 2	40.9073
Cp		250.483	40.7711	2.90196	adiabatic 2	40.9755
Cp		251.316	40.7836	2.90196	adiabatic 2	41.0431
Cp		252.145	40.8976	2.90196	adiabatic 2	41.1099
Cp		252.973	40.9287	2.90196	adiabatic 2	41.1762
Cp		253.797	40.9842	2.90196	adiabatic 2	41.2418
Cp		254.618	41.0793	2.90196	adiabatic 2	41.3066
Cp		255.438	41.1204	2.90196	adiabatic 2	41.3711
Cp		256.256	41.1759	2.90196	adiabatic 2	41.4349
Cp		257.071	41.2453	2.90196	adiabatic 2	41.4982
Cp		257.882	41.3648	2.90196	adiabatic 2	41.5607
Cp		258.692	41.4137	2.50847	adiabatic 2	41.6227
Cp		259.501	41.4427	2.50847	adiabatic 2	41.6843
Cp		260.307	41.4587	2.50847	adiabatic 2	41.7453
Cp		261.11	41.4867	2.50847	adiabatic 2	41.8057
Cp		261.908	41.5524	2.50847	adiabatic 2	41.8653
Cp		262.703	41.6499	2.50847	adiabatic 2	41.9244
Cp		263.498	41.6715	2.50847	adiabatic 2	41.9831
Cp		264.29	41.7339	2.50847	adiabatic 2	42.0412
Cp		265.079	41.8005	2.50847	adiabatic 2	42.0988
Cp		265.865	41.8815	2.50847	adiabatic 2	42.1558
Cp		266.648	41.9398	2.50847	adiabatic 2	42.2122
Cp		267.428	41.9551	2.50847	adiabatic 2	42.2681
Cp		268.207	42.0152	2.50847	adiabatic 2	42.3237
Cp		268.984	42.0675	2.50847	adiabatic 2	42.3786
Cp		269.757	42.1094	2.50847	adiabatic 2	42.4331
Cp		270.527	42.1863	2.50847	adiabatic 2	42.487
Cp		271.295	42.2292	2.50847	adiabatic 2	42.5404
Cp		272.062	42.3108	2.50847	adiabatic 2	42.5935
Cp		272.826	42.3806	2.50847	adiabatic 2	42.6461
Cp		273.587	42.4235	2.50847	adiabatic 2	42.6982
Cp		274.345	42.4231	2.50847	adiabatic 2	42.7497
Cp		275.099	42.5335	2.50847	adiabatic 2	42.8007
Cp		275.851	42.5643	2.50847	adiabatic 2	42.8513
Cp		276.601	42.6165	2.50847	adiabatic 2	42.9015
Cp		277.348	42.6672	2.50847	adiabatic 2	42.9512
Cp		278.091	42.6932	2.50847	adiabatic 2	43.0003
Cp		278.831	42.7483	2.50847	adiabatic 2	43.049
Cp		279.569	42.8332	2.50847	adiabatic 2	43.0973
Cp		280.305	42.8537	2.50847	adiabatic 2	43.1452
Cp		281.038	42.9362	2.50847	adiabatic 2	43.1926
Cp		281.769	42.9817	2.50847	adiabatic 2	43.2396
Cp		282.495	43.0308	2.50847	adiabatic 2	43.2861
Cp		283.218	43.0971	2.50847	adiabatic 2	43.3321
Cp		283.94	43.1034	2.50847	adiabatic 2	43.3779
Cp		284.66	43.1379	2.50847	adiabatic 2	43.4233
Cp		285.377	43.2162	2.50847	adiabatic 2	43.4682
Cp		286.088	43.3531	2.50847	adiabatic 2	43.5125
Cp		286.799	43.341	2.50847	adiabatic 2	43.5566
Cp		287.507	43.3392	2.50847	adiabatic 2	43.6003
Cp		288.211	43.425	2.50847	adiabatic 2	43.6435
Cp		288.913	43.4735	2.50847	adiabatic 2	43.6864
Cp		289.613	43.4376	2.50847	adiabatic 2	43.7289
Cp		290.307	43.5543	2.50847	adiabatic 2	43.7709
Cp		290.999	43.5792	2.50847	adiabatic 2	43.8125
Cp		291.689	43.6767	2.50847	adiabatic 2	43.8538
Cp		292.377	43.7404	2.50847	adiabatic 2	43.8947
Cp		293.061	43.7966	2.50847	adiabatic 2	43.9353
Cp		293.742	43.8235	2.50847	adiabatic 2	43.9754
Cp		294.419	43.8994	2.50847	adiabatic 2	44.0151
Cp		295.095	43.8695	2	adiabatic 2	44.0546
Cp		295.768	43.9314	2	adiabatic 2	44.0937
Cp		296.436	43.9564	2	adiabatic 2	44.1323
Cp		297.1	44.011	2	adiabatic 2	44.1705
Cp		297.762	44.0433	2	adiabatic 2	44.2084
Cp		298.42	44.097	2	adiabatic 2	44.2459
Cp		299.075	44.1568	2	adiabatic 2	44.2831
Cp		299.727	44.1975	2	adiabatic 2	44.3199
Cp		300.376	44.246	2	adiabatic 2	44.3563
Cp		301.021	44.2547	2	adiabatic 2	44.3924
Cp		301.66	44.334	2	adiabatic 2	44.428
Cp		302.299	44.3732	2	adiabatic 2	44.4634
Cp		302.934	44.4422	2	adiabatic 2	44.4985
Cp		303.567	44.4444	2	adiabatic 2	44.5332
Cp		304.195	44.4915	2	adiabatic 2	44.5676
Cp		304.819	44.5531	2	adiabatic 2	44.6015
Cp		305.442	44.5549	2	adiabatic 2	44.6353
Cp		306.061	44.6374	2	adiabatic 2	44.6687
Cp		306.677	44.6493	2	adiabatic 2	44.7018
Cp		307.288	44.6911	2	adiabatic 2	44.7344
Cp		307.895	44.7278	2	adiabatic 2	44.7668
Cp		308.501	44.7238	2	adiabatic 2	44.7989
Cp		309.102	44.7865	2	adiabatic 2	44.8307
Cp		309.7	44.8199	2	adiabatic 2	44.8621
Cp		310.294	44.8997	2	adiabatic 2	44.8932
Cp		310.884	44.8862	2	adiabatic 2	44.924
Cp		311.472	44.9182	2	adiabatic 2	44.9545
Cp		312.056	44.9619	2	adiabatic 2	44.9847
Cp		312.637	44.9492	2	adiabatic 2	45.0146
Cp		313.213	45.0313	2	adiabatic 2	45.0442
Cp		313.786	45.0757	2	adiabatic 2	45.0734
Cp		314.355	45.1272	2	adiabatic 2	45.1024
Cp		314.923	45.1667	2	adiabatic 2	45.1311
Cp		315.488	45.1253	2	adiabatic 2	45.1597
Cp		316.047	45.2334	2	adiabatic 2	45.1878
Cp		316.602	45.2562	2	adiabatic 2	45.2156
Cp		317.154	45.2848	2	adiabatic 2	45.2431
Cp		317.704	45.331	2	adiabatic 2	45.2705
Cp		318.25	45.2965	2	adiabatic 2	45.2975
Cp		318.792	45.3558	2	adiabatic 2	45.3242
Cp		319.329	45.3768	2	adiabatic 2	45.3506
Cp		319.863	45.4402	2	adiabatic 2	45.3767
Cp		320.394	45.4464	2	adiabatic 2	45.4027
Cp		320.922	45.4238	2	adiabatic 2	45.4283
Cp		321.445	45.4632	2	adiabatic 2	45.4537
Cp		321.964	45.5295	2	adiabatic 2	45.4787
Cp		322.479	45.5015	2	adiabatic 2	45.5035
Cp		322.992	45.5659	2	adiabatic 2	45.528
Cp		323.501	45.5553	2	adiabatic 2	45.5523
Cp		324.006	45.6183	2	adiabatic 2	45.5764
Cp		324.508	45.6425	2	adiabatic 2	45.6002
Cp		325.005	45.6644	2	adiabatic 2	45.6237
Cp		325.499	45.6694	2	adiabatic 2	45.6469
Cp		325.99	45.7038	2	adiabatic 2	45.6699
Cp		326.477	45.7566	2	adiabatic 2	45.6927
Cp		326.961	45.7753	2	adiabatic 2	45.7153
Cp		327.44	45.7948	2	adiabatic 2	45.7375
Cp		327.916	45.8492	2	adiabatic 2	45.7596
Cp		328.389	45.8254	2	adiabatic 2	45.7814
Cp		328.859	45.8744	2	adiabatic 2	45.803
Cp		329.326	45.8905	2	adiabatic 2	45.8244
Cp		329.789	45.9116	2	adiabatic 2	45.8456
Cp		330.247	45.9222	2	adiabatic 2	45.8665
Cp		330.476	45.8252	2	adiabatic 2	45.8769
Cp		331.072	45.9083	3.7	adiabatic 2	45.9039
Cp		331.665	45.9309	3.7	adiabatic 2	45.9307
Cp		332.253	45.9577	3.7	adiabatic 2	45.9572
Cp		332.836	45.9939	3.7	adiabatic 2	45.9833
Cp		333.416	46.0647	3.7	adiabatic 2	46.0092
Cp		333.992	46.091	3.7	adiabatic 2	46.0348
Cp		334.564	46.0857	3.7	adiabatic 2	46.0601
Cp		335.133	46.1236	3.7	adiabatic 2	46.0852
Cp		335.697	46.1791	3.7	adiabatic 2	46.1099
Cp		336.257	46.237	3.7	adiabatic 2	46.1344
Cp		336.814	46.2241	3.7	adiabatic 2	46.1588
Cp		337.368	46.2661	3.7	adiabatic 2	46.1828
Cp		337.917	46.3035	3.7	adiabatic 2	46.2066
Cp		338.461	46.3403	3.7	adiabatic 2	46.23
Cp		339.003	46.3506	3.7	adiabatic 2	46.2533
Cp		339.54	46.38	3.7	adiabatic 2	46.2763
Cp		340.072	46.4021	3.7	adiabatic 2	46.299
Cp		340.602	46.4009	3.7	adiabatic 2	46.3215
Cp		341.126	46.4198	3.7	adiabatic 2	46.3437
Cp		341.647	46.4336	3.7	adiabatic 2	46.3657
Cp		342.164	46.4379	3.7	adiabatic 2	46.3875
Cp		342.676	46.4941	3.7	adiabatic 2	46.4089
Cp		343.184	46.5373	3.7	adiabatic 2	46.4301
Cp		343.69	46.5987	3.7	adiabatic 2	46.4512
Cp		344.19	46.6113	3.7	adiabatic 2	46.472
Cp		344.688	46.645	3.7	adiabatic 2	46.4925
Cp		345.182	46.6812	3.7	adiabatic 2	46.5129
Cp		345.674	46.7037	3.7	adiabatic 2	46.5331
Cp		346.16	46.7208	3.7	adiabatic 2	46.553
Cp		346.643	46.7133	3.7	adiabatic 2	46.5727
Cp		347.124	46.736	3.7	adiabatic 2	46.5923
Cp		347.6	46.7163	3.7	adiabatic 2	46.6116
Cp		348.071	46.8055	3.7	adiabatic 2	46.6307
Cp		348.541	46.8032	3.7	adiabatic 2	46.6496
Cp		349.007	46.8478	3.7	adiabatic 2	46.6683
Cp		311.738	45.8885	0	DSC 1	44.9683
Cp		312.237	45.9176	0	DSC 1	44.994
Cp		312.735	45.9455	0	DSC 1	45.0196
Cp		313.233	45.9759	0	DSC 1	45.0452
Cp		313.731	46.0061	0	DSC 1	45.0706
Cp		314.23	46.0399	0	DSC 1	45.096
Cp		314.728	46.0721	0	DSC 1	45.1213
Cp		315.226	46.1003	0	DSC 1	45.1465
Cp		315.725	46.1291	0	DSC 1	45.1716
Cp		316.223	46.1587	0	DSC 1	45.1966
Cp		316.721	46.1877	0	DSC 1	45.2216
Cp		317.22	46.2185	0	DSC 1	45.2464
Cp		317.718	46.2492	0	DSC 1	45.2712
Cp		318.216	46.2814	0	DSC 1	45.2958
Cp		318.715	46.316	0	DSC 1	45.3204
Cp		319.213	46.3496	0	DSC 1	45.3449
Cp		319.711	46.3833	0	DSC 1	45.3693
Cp		320.209	46.417	0	DSC 1	45.3937
Cp		320.708	46.4518	0	DSC 1	45.4179
Cp		321.206	46.4852	0	DSC 1	45.4421
Cp		321.704	46.516	0	DSC 1	45.4662
Cp		322.203	46.5477	0	DSC 1	45.4902
Cp		322.701	46.5781	0	DSC 1	45.5141
Cp		323.199	46.6091	0	DSC 1	45.5379
Cp		323.698	46.6375	0	DSC 1	45.5617
Cp		324.196	46.6659	0	DSC 1	45.5854
Cp		324.694	46.6963	0	DSC 1	45.609
Cp		325.193	46.7269	0	DSC 1	45.6325
Cp		325.691	46.7555	0	DSC 1	45.6559
Cp		326.189	46.782	0	DSC 1	45.6793
Cp		326.688	46.8091	0	DSC 1	45.7025
Cp		327.186	46.836	0	DSC 1	45.7257
Cp		327.684	46.8632	0	DSC 1	45.7488
Cp		328.182	46.8899	0	DSC 1	45.7719
Cp		328.681	46.9175	0	DSC 1	45.7948
Cp		329.179	46.9446	0	DSC 1	45.8177
Cp		329.677	46.9728	0	DSC 1	45.8405
Cp		330.176	46.9997	0	DSC 1	45.8632
Cp		330.674	47.0239	0	DSC 1	45.8859
Cp		331.172	47.048	0	DSC 1	45.9085
Cp		331.671	47.0727	0	DSC 1	45.931
Cp		332.169	47.0975	0	DSC 1	45.9534
Cp		332.667	47.1217	0	DSC 1	45.9757
Cp		333.166	47.1459	0	DSC 1	45.998
Cp		333.664	47.1702	0	DSC 1	46.0202
Cp		334.162	47.1957	0	DSC 1	46.0423
Cp		334.66	47.2217	0	DSC 1	46.0643
Cp		335.159	47.2489	0	DSC 1	46.0863
Cp		335.657	47.2771	0	DSC 1	46.1082
Cp		336.155	47.3066	0	DSC 1	46.13
Cp		336.654	47.3362	0	DSC 1	46.1518
Cp		337.152	47.3656	0	DSC 1	46.1734
Cp		337.65	47.3944	0	DSC 1	46.195
Cp		338.149	47.4204	0	DSC 1	46.2166
Cp		338.647	47.4458	0	DSC 1	46.238
Cp		339.145	47.4725	0	DSC 1	46.2594
Cp		339.644	47.4999	0	DSC 1	46.2807
Cp		340.142	47.5273	0	DSC 1	46.302
Cp		340.64	47.5536	0	DSC 1	46.3231
Cp		341.139	47.5773	0	DSC 1	46.3442
Cp		341.637	47.5994	0	DSC 1	46.3653
Cp		342.135	47.6204	0	DSC 1	46.3862
Cp		342.633	47.6428	0	DSC 1	46.4071
Cp		343.132	47.6655	0	DSC 1	46.428
Cp		343.63	47.686	0	DSC 1	46.4487
Cp		344.128	47.7072	0	DSC 1	46.4694
Cp		344.627	47.7282	0	DSC 1	46.49
Cp		345.125	47.7489	0	DSC 1	46.5106
Cp		345.623	47.7701	0	DSC 1	46.531
Cp		346.122	47.7933	0	DSC 1	46.5515
Cp		346.62	47.8177	0	DSC 1	46.5718
Cp		347.118	47.8424	0	DSC 1	46.5921
Cp		347.617	47.8666	0	DSC 1	46.6123
Cp		348.115	47.8889	0	DSC 1	46.6324
Cp		348.613	47.9105	0	DSC 1	46.6525
Cp		349.111	47.932	0	DSC 1	46.6725
Cp		349.61	47.9527	0	DSC 1	46.6925
Cp		350.108	47.9725	0	DSC 1	46.7124
Cp		350.606	47.9918	0	DSC 1	46.7322
Cp		351.105	48.0102	0	DSC 1	46.7519
Cp		351.603	48.0272	0	DSC 1	46.7716
Cp		352.101	48.0427	0	DSC 1	46.7912
Cp		352.6	48.0576	0	DSC 1	46.8108
Cp		353.098	48.0715	0	DSC 1	46.8303
Cp		353.596	48.0865	0	DSC 1	46.8497
Cp		354.095	48.1026	0	DSC 1	46.8691
Cp		354.593	48.1196	0	DSC 1	46.8884
Cp		355.091	48.1376	0	DSC 1	46.9076
Cp		355.589	48.1543	0	DSC 1	46.9268
Cp		356.088	48.169	0	DSC 1	46.9459
Cp		356.586	48.1823	0	DSC 1	46.965
Cp		357.084	48.1955	0	DSC 1	46.984
Cp		357.583	48.2104	0	DSC 1	47.0029
Cp		358.081	48.2253	0	DSC 1	47.0218
Cp		358.579	48.2396	0	DSC 1	47.0406
Cp		359.078	48.2536	0	DSC 1	47.0593
Cp		359.576	48.2674	0	DSC 1	47.078
Cp		360.074	48.2803	0	DSC 1	47.0966
Cp		360.573	48.2916	0	DSC 1	47.1152
Cp		361.071	48.3021	0	DSC 1	47.1337
Cp		361.569	48.3135	0	DSC 1	47.1522
Cp		362.068	48.3261	0	DSC 1	47.1706
Cp		362.566	48.3398	0	DSC 1	47.1889
Cp		363.064	48.3544	0	DSC 1	47.2072
Cp		363.562	48.3691	0	DSC 1	47.2254
Cp		364.061	48.3844	0	DSC 1	47.2435
Cp		364.559	48.401	0	DSC 1	47.2616
Cp		365.057	48.4178	0	DSC 1	47.2796
Cp		365.556	48.434	0	DSC 1	47.2976
Cp		366.054	48.4497	0	DSC 1	47.3155
Cp		366.552	48.4654	0	DSC 1	47.3334
Cp		367.051	48.4798	0	DSC 1	47.3512
Cp		367.549	48.4941	0	DSC 1	47.369
Cp		368.047	48.5085	0	DSC 1	47.3867
Cp		368.546	48.5242	0	DSC 1	47.4043
Cp		369.044	48.5402	0	DSC 1	47.4219
Cp		369.542	48.5563	0	DSC 1	47.4394
Cp		370.04	48.5715	0	DSC 1	47.4569
Cp		370.539	48.5871	0	DSC 1	47.4743
Cp		371.037	48.6024	0	DSC 1	47.4917
Cp		371.535	48.6167	0	DSC 1	47.509
Cp		372.034	48.6324	0	DSC 1	47.5262
Cp		372.532	48.65	0	DSC 1	47.5434
Cp		373.03	48.6686	0	DSC 1	47.5605
Cp		373.529	48.6881	0	DSC 1	47.5776
Cp		374.027	48.7087	0	DSC 1	47.5947
Cp		374.525	48.7304	0	DSC 1	47.6116
Cp		375.024	48.7538	0	DSC 1	47.6286
Cp		375.522	48.7776	0	DSC 1	47.6454
Cp		376.02	48.801	0	DSC 1	47.6623
Cp		376.519	48.8335	0	DSC 1	47.679
Cp		377.017	48.8503	0	DSC 1	47.6957
Cp		377.515	48.8656	0	DSC 1	47.7124
Cp		378.013	48.8801	0	DSC 1	47.729
Cp		378.512	48.8942	0	DSC 1	47.7456
Cp		379.01	48.9074	0	DSC 1	47.7621
Cp		379.508	48.9196	0	DSC 1	47.7785
Cp		380.007	48.931	0	DSC 1	47.7949
Cp		380.505	48.9415	0	DSC 1	47.8113
Cp		381.003	48.9507	0	DSC 1	47.8276
Cp		381.502	48.9599	0	DSC 1	47.8438
Cp		382	48.9687	0	DSC 1	47.86
Cp		382.498	48.9776	0	DSC 1	47.8762
Cp		382.997	48.9866	0	DSC 1	47.8923
Cp		383.495	48.9957	0	DSC 1	47.9083
Cp		383.993	49.0041	0	DSC 1	47.9243
Cp		384.491	49.0122	0	DSC 1	47.9403
Cp		384.99	49.0203	0	DSC 1	47.9562
Cp		385.488	49.028	0	DSC 1	47.972
Cp		385.986	49.0352	0	DSC 1	47.9878
Cp		386.485	49.0424	0	DSC 1	48.0036
Cp		386.983	49.0496	0	DSC 1	48.0193
Cp		387.481	49.0557	0	DSC 1	48.035
Cp		387.98	49.0607	0	DSC 1	48.0506
Cp		388.478	49.0651	0	DSC 1	48.0661
Cp		388.976	49.0696	0	DSC 1	48.0816
Cp		389.475	49.0746	0	DSC 1	48.0971
Cp		389.973	49.0805	0	DSC 1	48.1125
Cp		390.471	49.0864	0	DSC 1	48.1279
Cp		390.97	49.0929	0	DSC 1	48.1432
Cp		391.468	49.0996	0	DSC 1	48.1585
Cp		391.966	49.1071	0	DSC 1	48.1737
Cp		392.464	49.1153	0	DSC 1	48.1889
Cp		392.963	49.1245	0	DSC 1	48.204
Cp		393.461	49.1363	0	DSC 1	48.2191
Cp		393.959	49.1503	0	DSC 1	48.2342
Cp		394.458	49.1665	0	DSC 1	48.2491
Cp		394.956	49.1838	0	DSC 1	48.2641
Cp		395.454	49.2018	0	DSC 1	48.279
Cp		395.953	49.2197	0	DSC 1	48.2939
Cp		396.451	49.2373	0	DSC 1	48.3087
Cp		396.949	49.2544	0	DSC 1	48.3234
Cp		397.448	49.2717	0	DSC 1	48.3382
Cp		397.946	49.2891	0	DSC 1	48.3529
Cp		398.444	49.306	0	DSC 1	48.3675
Cp		398.942	49.3226	0	DSC 1	48.3821
Cp		399.441	49.3393	0	DSC 1	48.3966
Cp		399.939	49.356	0	DSC 1	48.4111
Cp		400.437	49.373	3.52381	DSC 1	48.4256
Cp		400.936	49.3902	3.52381	DSC 1	48.44
Cp		401.434	49.4073	3.52381	DSC 1	48.4544
Cp		401.932	49.4242	3.52381	DSC 1	48.4687
Cp		402.431	49.4392	3.52381	DSC 1	48.483
Cp		402.929	49.4528	3.52381	DSC 1	48.4972
Cp		403.427	49.4654	3.52381	DSC 1	48.5114
Cp		403.926	49.4771	0.333333	DSC 1	48.5256
Cp		404.424	49.4883	0.333333	DSC 1	48.5397
Cp		404.922	49.4991	0.333333	DSC 1	48.5538
Cp		405.421	49.5095	0.333333	DSC 1	48.5678
Cp		405.919	49.5196	0.333333	DSC 1	48.5818
Cp		406.417	49.5296	0.333333	DSC 1	48.5958
Cp		406.915	49.5403	0.333333	DSC 1	48.6097
Cp		407.414	49.5505	0.333333	DSC 1	48.6235
Cp		407.912	49.5611	0.333333	DSC 1	48.6373
Cp		408.41	49.5717	0.333333	DSC 1	48.6511
Cp		408.909	49.5819	0.333333	DSC 1	48.6649
Cp		409.407	49.5912	0.333333	DSC 1	48.6786
Cp		409.905	49.5977	0.333333	DSC 1	48.6922
Cp		410.404	49.6061	0.333333	DSC 1	48.7058
Cp		410.902	49.614	0.333333	DSC 1	48.7194
Cp		411.4	49.6228	0.333333	DSC 1	48.733
Cp		411.899	49.6326	0.333333	DSC 1	48.7464
Cp		412.397	49.6408	0.333333	DSC 1	48.7599
Cp		412.895	49.6468	0.333333	DSC 1	48.7733
Cp		413.393	49.6531	0.333333	DSC 1	48.7867
Cp		413.892	49.6605	0.333333	DSC 1	48.8
Cp		414.39	49.6674	0.333333	DSC 1	48.8133
Cp		414.888	49.6759	0.333333	DSC 1	48.8266
Cp		415.387	49.6864	0.333333	DSC 1	48.8398
Cp		415.885	49.6989	0.333333	DSC 1	48.853
Cp		416.383	49.7111	0.333333	DSC 1	48.8661
Cp		416.882	49.722	0.333333	DSC 1	48.8792
Cp		417.38	49.7314	0.333333	DSC 1	48.8923
Cp		417.878	49.7402	0.333333	DSC 1	48.9053
Cp		418.377	49.7491	0.333333	DSC 1	48.9183
Cp		418.875	49.759	0.333333	DSC 1	48.9313
Cp		419.373	49.7684	0.333333	DSC 1	48.9442
Cp		419.871	49.778	0.333333	DSC 1	48.9571
Cp		420.37	49.7883	0.333333	DSC 1	48.9699
Cp		420.868	49.7992	0.333333	DSC 1	48.9827
Cp		421.366	49.81	0.333333	DSC 1	48.9955
Cp		421.865	49.822	0.333333	DSC 1	49.0082
Cp		422.363	49.8346	0.333333	DSC 1	49.0209
Cp		422.861	49.8472	0.333333	DSC 1	49.0335
Cp		423.36	49.8594	0.333333	DSC 1	49.0461
Cp		423.858	49.8719	0.333333	DSC 1	49.0587
Cp		424.356	49.8839	0.333333	DSC 1	49.0712
Cp		424.855	49.8959	0.333333	DSC 1	49.0837
Cp		425.353	49.9091	0.333333	DSC 1	49.0962
Cp		425.851	49.9234	0.333333	DSC 1	49.1086
Cp		426.35	49.9376	0.333333	DSC 1	49.121
Cp		426.848	49.9526	0.333333	DSC 1	49.1334
Cp		427.346	49.9672	0.333333	DSC 1	49.1457
Cp		427.844	49.9815	0.333333	DSC 1	49.158
Cp		428.343	49.9957	0.333333	DSC 1	49.1703
Cp		428.841	50.0102	0.333333	DSC 1	49.1825
Cp		429.339	50.0243	0.333333	DSC 1	49.1947
Cp		429.838	50.0379	0.333333	DSC 1	49.2068
Cp		430.336	50.0524	0.333333	DSC 1	49.2189
Cp		430.834	50.0668	0.333333	DSC 1	49.231
Cp		431.333	50.0802	0.333333	DSC 1	49.243
Cp		431.831	50.0924	0.333333	DSC 1	49.2551
Cp		432.329	50.1036	0.333333	DSC 1	49.267
Cp		432.828	50.1161	0.333333	DSC 1	49.279
Cp		433.326	50.1283	0.333333	DSC 1	49.2909
Cp		433.824	50.1386	0.333333	DSC 1	49.3027
Cp		434.322	50.1485	0.333333	DSC 1	49.3146
Cp		434.821	50.1584	0.333333	DSC 1	49.3264
Cp		435.319	50.1674	0.333333	DSC 1	49.3381
Cp		435.817	50.1748	0.333333	DSC 1	49.3499
Cp		436.316	50.1813	0.333333	DSC 1	49.3616
Cp		436.814	50.189	0.333333	DSC 1	49.3733
Cp		437.312	50.196	0.333333	DSC 1	49.3849
Cp		437.811	50.202	0.333333	DSC 1	49.3965
Cp		438.309	50.2071	0.333333	DSC 1	49.4081
Cp		438.807	50.2115	0.333333	DSC 1	49.4196
Cp		439.306	50.2161	0.333333	DSC 1	49.4311
Cp		439.804	50.2212	0.333333	DSC 1	49.4426
Cp		440.302	50.2274	0.335601	DSC 1	49.454
Cp		440.801	50.2345	0.335601	DSC 1	49.4654
Cp		441.299	50.2416	0.335601	DSC 1	49.4768
Cp		441.797	50.2471	0.335601	DSC 1	49.4881
Cp		442.295	50.2513	0.335601	DSC 1	49.4994
Cp		442.794	50.2543	0.335601	DSC 1	49.5107
Cp		443.292	50.2578	0.335601	DSC 1	49.522
Cp		443.79	50.2617	0.335601	DSC 1	49.5332
Cp		444.289	50.265	0.335601	DSC 1	49.5444
Cp		444.787	50.2691	0.335601	DSC 1	49.5555
Cp		445.285	50.2732	0.335601	DSC 1	49.5666
Cp		445.784	50.2764	0.335601	DSC 1	49.5777
Cp		446.282	50.2784	0.335601	DSC 1	49.5888
Cp		446.78	50.2798	0.335601	DSC 1	49.5998
Cp		447.279	50.2828	0.335601	DSC 1	49.6108
Cp		447.777	50.2877	0.335601	DSC 1	49.6218
Cp		448.275	50.2919	0.335601	DSC 1	49.6327
Cp		448.773	50.2954	0.335601	DSC 1	49.6436
Cp		449.272	50.2985	0.335601	DSC 1	49.6545
Cp		449.77	50.3016	0.335601	DSC 1	49.6653
Cp		450.268	50.3038	0.335601	DSC 1	49.6761
Cp		450.767	50.3063	0.335601	DSC 1	49.6869
Cp		451.265	50.3098	0.335601	DSC 1	49.6977
Cp		451.763	50.3137	0.335601	DSC 1	49.7084
Cp		452.262	50.3178	0.335601	DSC 1	49.7191
Cp		452.76	50.3213	0.335601	DSC 1	49.7297
Cp		453.258	50.3239	0.335601	DSC 1	49.7404
Cp		453.757	50.3259	0.335601	DSC 1	49.751
Cp		454.255	50.3288	0.335601	DSC 1	49.7616
Cp		454.753	50.3323	0.335601	DSC 1	49.7721
Cp		455.252	50.3361	0.335601	DSC 1	49.7826
Cp		455.75	50.3398	0.335601	DSC 1	49.7931
Cp		456.248	50.344	0.335601	DSC 1	49.8036
Cp		456.746	50.3468	0.335601	DSC 1	49.814
Cp		457.245	50.3494	0.335601	DSC 1	49.8244
Cp		457.743	50.3536	0.335601	DSC 1	49.8348
Cp		458.241	50.3581	0.335601	DSC 1	49.8451
Cp		458.74	50.3626	0.335601	DSC 1	49.8554
Cp		459.238	50.3662	0.335601	DSC 1	49.8657
Cp		459.736	50.3698	0.335601	DSC 1	49.876
Cp		460.235	50.3736	0.335601	DSC 1	49.8862
Cp		460.733	50.3775	0.335601	DSC 1	49.8964
Cp		461.231	50.3812	0.335601	DSC 1	49.9066
Cp		461.73	50.3855	0.335601	DSC 1	49.9167
Cp		462.228	50.3903	0.335601	DSC 1	49.9268
Cp		462.726	50.3952	0.335601	DSC 1	49.9369
Cp		463.224	50.399	0.335601	DSC 1	49.947
Cp		463.723	50.4012	0.335601	DSC 1	49.957
Cp		464.221	50.4038	0.335601	DSC 1	49.967
Cp		464.719	50.4072	0.335601	DSC 1	49.977
Cp		465.218	50.4119	0.335601	DSC 1	49.9869
Cp		465.716	50.4159	0.335601	DSC 1	49.9969
Cp		466.214	50.4201	0.335601	DSC 1	50.0068
Cp		466.713	50.4247	0.335601	DSC 1	50.0166
Cp		467.211	50.4297	0.335601	DSC 1	50.0265
Cp		467.709	50.4331	0.335601	DSC 1	50.0363
Cp		468.208	50.4365	0.335601	DSC 1	50.0461
Cp		468.706	50.4404	0.335601	DSC 1	50.0559
Cp		469.204	50.4454	0.335601	DSC 1	50.0656
Cp		469.702	50.4493	0.335601	DSC 1	50.0753
Cp		470.201	50.4525	0.335601	DSC 1	50.085
Cp		470.699	50.4557	0.335601	DSC 1	50.0946
Cp		471.197	50.4582	0.335601	DSC 1	50.1043
Cp		471.696	50.4618	0.335601	DSC 1	50.1139
Cp		472.194	50.4656	0.335601	DSC 1	50.1235
Cp		472.692	50.4701	0.335601	DSC 1	50.133
Cp		473.191	50.4752	0.335601	DSC 1	50.1426
Cp		473.689	50.4792	0.335601	DSC 1	50.1521
Cp		474.187	50.4829	0.335601	DSC 1	50.1615
Cp		474.686	50.4859	0.335601	DSC 1	50.171
Cp		475.184	50.4893	0.335601	DSC 1	50.1804
Cp		475.682	50.4943	0.335601	DSC 1	50.1898
Cp		476.181	50.4999	0.335601	DSC 1	50.1992
Cp		476.679	50.5057	0.335601	DSC 1	50.2085
Cp		477.177	50.5113	0.335601	DSC 1	50.2179
Cp		477.675	50.5159	0.335601	DSC 1	50.2272
Cp		478.174	50.5191	0.335601	DSC 1	50.2365
Cp		478.672	50.5227	0.335601	DSC 1	50.2457
Cp		479.17	50.5279	0.335601	DSC 1	50.2549
Cp		479.669	50.5356	0.335601	DSC 1	50.2641
Cp		480.167	50.5429	0.335601	DSC 1	50.2733
Cp		480.665	50.5484	0.335601	DSC 1	50.2825
Cp		481.164	50.5539	0.335601	DSC 1	50.2916
Cp		481.662	50.5589	0.335601	DSC 1	50.3007
Cp		482.16	50.5632	0.335601	DSC 1	50.3098
Cp		482.659	50.5676	0.335601	DSC 1	50.3188
Cp		483.157	50.5725	0.335601	DSC 1	50.3279
Cp		483.655	50.578	0.335601	DSC 1	50.3369
Cp		484.153	50.5835	0.335601	DSC 1	50.3459
Cp		484.652	50.5882	0.335601	DSC 1	50.3548
Cp		485.15	50.591	0.335601	DSC 1	50.3638
Cp		485.648	50.5925	0.335601	DSC 1	50.3727
Cp		486.147	50.5948	0.335601	DSC 1	50.3816
Cp		486.645	50.5977	0.335601	DSC 1	50.3904
Cp		487.143	50.6	0.335601	DSC 1	50.3993
Cp		487.642	50.602	0.335601	DSC 1	50.4081
Cp		488.14	50.6037	0.335601	DSC 1	50.4169
Cp		488.638	50.605	0.335601	DSC 1	50.4257
Cp		489.137	50.6054	0.335601	DSC 1	50.4344
Cp		489.635	50.6061	0.335601	DSC 1	50.4431
Cp		490.133	50.609	0.335601	DSC 1	50.4519
Cp		490.632	50.611	0.335601	DSC 1	50.4605
Cp		491.13	50.6125	0.335601	DSC 1	50.4692
Cp		491.628	50.6144	0.335601	DSC 1	50.4778
Cp		492.126	50.6163	0.335601	DSC 1	50.4864
Cp		492.625	50.6186	0.335601	DSC 1	50.495
Cp		493.123	50.6219	0.335601	DSC 1	50.5036
Cp		493.621	50.6276	0.335601	DSC 1	50.5122
Cp		494.12	50.6331	0.335601	DSC 1	50.5207
Cp		494.618	50.6388	0.335601	DSC 1	50.5292
Cp		495.116	50.6445	0.335601	DSC 1	50.5377
Cp		495.615	50.6492	0.335601	DSC 1	50.5461
Cp		496.113	50.6532	0.335601	DSC 1	50.5546
Cp		496.611	50.6574	0.335601	DSC 1	50.563
Cp		497.11	50.6623	0.335601	DSC 1	50.5714
Cp		497.608	50.6675	0.335601	DSC 1	50.5797
Cp		498.106	50.6725	0.335601	DSC 1	50.5881
Cp		498.604	50.6769	0.335601	DSC 1	50.5964
Cp		499.103	50.6817	0.335601	DSC 1	50.6047
Cp		499.601	50.6861	0.335601	DSC 1	50.613
Cp		500.099	50.6898	0.335601	DSC 1	50.6213
Cp		500.598	50.6948	0.335601	DSC 1	50.6295
Cp		501.096	50.7005	0.335601	DSC 1	50.6377
Cp		501.594	50.7061	0.335601	DSC 1	50.6459
Cp		502.093	50.7106	0.335601	DSC 1	50.6541
Cp		502.591	50.7144	0.335601	DSC 1	50.6622
Cp		503.089	50.7175	0.335601	DSC 1	50.6704
Cp		503.588	50.7203	0.335601	DSC 1	50.6785
Cp		504.086	50.7234	0.335601	DSC 1	50.6866
Cp		504.584	50.7261	0.335601	DSC 1	50.6947
Cp		505.082	50.7285	0.335601	DSC 1	50.7027
Cp		505.581	50.7317	0.335601	DSC 1	50.7107
Cp		506.079	50.7365	0.335601	DSC 1	50.7188
Cp		506.577	50.7406	0.335601	DSC 1	50.7267
Cp		507.076	50.7441	0.335601	DSC 1	50.7347
Cp		507.574	50.7487	0.335601	DSC 1	50.7427
Cp		508.072	50.7548	0.335601	DSC 1	50.7506
Cp		508.571	50.7603	0.335601	DSC 1	50.7585
Cp		509.069	50.7651	0.335601	DSC 1	50.7664
Cp		509.567	50.7698	0.335601	DSC 1	50.7743
Cp		510.066	50.7731	0.335601	DSC 1	50.7821
Cp		510.564	50.7763	0.335601	DSC 1	50.7899
Cp		511.062	50.78	0.335601	DSC 1	50.7977
Cp		511.561	50.7834	0.335601	DSC 1	50.8055
Cp		512.059	50.7875	0.335601	DSC 1	50.8133
Cp		512.557	50.7914	0.333333	DSC 1	50.821
Cp		513.055	50.7957	0.333333	DSC 1	50.8288
Cp		513.554	50.8	0.333333	DSC 1	50.8365
Cp		514.052	50.8029	0.333333	DSC 1	50.8442
Cp		514.55	50.8064	0.333333	DSC 1	50.8518
Cp		515.049	50.8106	0.333333	DSC 1	50.8595
Cp		515.547	50.8147	0.333333	DSC 1	50.8671
Cp		516.045	50.818	0.333333	DSC 1	50.8747
Cp		516.544	50.8213	0.333333	DSC 1	50.8823
Cp		517.042	50.8247	0.333333	DSC 1	50.8899
Cp		517.54	50.8272	0.333333	DSC 1	50.8975
Cp		518.039	50.8299	0.333333	DSC 1	50.905
Cp		518.537	50.8331	0.333333	DSC 1	50.9125
Cp		519.035	50.8368	0.333333	DSC 1	50.92
Cp		519.533	50.8402	0.333333	DSC 1	50.9275
Cp		520.032	50.8438	0.333333	DSC 1	50.935
Cp		520.53	50.8479	0.333333	DSC 1	50.9424
Cp		521.028	50.8504	0.333333	DSC 1	50.9498
Cp		521.527	50.8529	0.333333	DSC 1	50.9572
Cp		522.025	50.8571	0.333333	DSC 1	50.9646
Cp		522.523	50.8623	0.333333	DSC 1	50.972
Cp		523.022	50.8687	0.333333	DSC 1	50.9793
Cp		523.52	50.8749	0.333333	DSC 1	50.9867
Cp		524.018	50.8807	0.333333	DSC 1	50.994
Cp		524.517	50.8853	0.333333	DSC 1	51.0013
Cp		525.015	50.8895	0.333333	DSC 1	51.0085
Cp		525.513	50.8945	0.333333	DSC 1	51.0158
Cp		526.012	50.9008	0.333333	DSC 1	51.023
Cp		526.51	50.9085	0.333333	DSC 1	51.0303
Cp		527.008	50.916	0.333333	DSC 1	51.0375
Cp		527.506	50.9238	0.333333	DSC 1	51.0447
Cp		528.005	50.9315	0.333333	DSC 1	51.0518
Cp		528.503	50.9391	0.333333	DSC 1	51.059
Cp		529.001	50.9473	0.333333	DSC 1	51.0661
Cp		529.5	50.9541	0.333333	DSC 1	51.0732
Cp		529.998	50.9598	0.333333	DSC 1	51.0803
Cp		530.496	50.9663	0.333333	DSC 1	51.0874
Cp		530.995	50.9728	0.333333	DSC 1	51.0945
Cp		531.493	50.9794	0.333333	DSC 1	51.1015
Cp		531.991	50.9853	0.333333	DSC 1	51.1085
Cp		532.49	50.9926	0.333333	DSC 1	51.1155
Cp		532.988	51.0017	0.333333	DSC 1	51.1225
Cp		533.486	51.0103	0.333333	DSC 1	51.1295
Cp		533.984	51.0186	0.333333	DSC 1	51.1365
Cp		534.483	51.0271	0.333333	DSC 1	51.1434
Cp		534.981	51.0355	0.333333	DSC 1	51.1503
Cp		535.479	51.043	0.333333	DSC 1	51.1572
Cp		535.978	51.051	0.333333	DSC 1	51.1641
Cp		536.476	51.0601	0.333333	DSC 1	51.171
Cp		536.974	51.0695	0.333333	DSC 1	51.1779
Cp		537.473	51.0785	0.333333	DSC 1	51.1847
Cp		537.971	51.0871	0.333333	DSC 1	51.1915
Cp		538.469	51.0958	0.333333	DSC 1	51.1983
Cp		538.968	51.1044	0.333333	DSC 1	51.2051
Cp		539.466	51.1138	0.333333	DSC 1	51.2119
Cp		539.964	51.1233	0.333333	DSC 1	51.2186
Cp		540.463	51.1329	0.333333	DSC 1	51.2254
Cp		540.961	51.1419	0.333333	DSC 1	51.2321
Cp		541.459	51.1504	0.333333	DSC 1	51.2388
Cp		541.957	51.157	0.333333	DSC 1	51.2455
Cp		542.456	51.1614	0.333333	DSC 1	51.2522
Cp		542.954	51.1668	0.333333	DSC 1	51.2588
Cp		543.452	51.1742	0.333333	DSC 1	51.2655
Cp		543.951	51.1814	0.333333	DSC 1	51.2721
Cp		544.449	51.1889	0.333333	DSC 1	51.2787
Cp		544.947	51.1964	0.333333	DSC 1	51.2853
Cp		545.446	51.2037	0.333333	DSC 1	51.2919
Cp		545.944	51.2103	0.333333	DSC 1	51.2984
Cp		546.442	51.215	0.333333	DSC 1	51.305
Cp		546.941	51.221	0.333333	DSC 1	51.3115
Cp		547.439	51.2278	0.333333	DSC 1	51.318
Cp		547.937	51.2351	0.333333	DSC 1	51.3245
Cp		548.435	51.242	0.333333	DSC 1	51.331
Cp		548.934	51.248	0.335601	DSC 1	51.3375
Cp		549.432	51.2541	0.335601	DSC 1	51.3439
Cp		549.93	51.2618	0.335601	DSC 1	51.3504
Cp		550.429	51.2712	0.335601	DSC 1	51.3568
Cp		550.927	51.2816	0.335601	DSC 1	51.3632
Cp		551.425	51.293	0.335601	DSC 1	51.3696
Cp		551.924	51.3052	0.335601	DSC 1	51.376
Cp		552.422	51.319	0.335601	DSC 1	51.3823
Cp		552.92	51.3294	0.335601	DSC 1	51.3887
Cp		553.419	51.3387	0.335601	DSC 1	51.395
Cp		553.917	51.3488	0.335601	DSC 1	51.4013
Cp		554.415	51.3595	0.335601	DSC 1	51.4076
Cp		554.913	51.3708	0.335601	DSC 1	51.4139
Cp		555.412	51.3822	0.335601	DSC 1	51.4202
Cp		555.91	51.393	0.335601	DSC 1	51.4264
Cp		556.408	51.4018	0.335601	DSC 1	51.4327
Cp		556.907	51.4095	0.335601	DSC 1	51.4389
Cp		557.405	51.4194	0.335601	DSC 1	51.4451
Cp		557.903	51.431	0.335601	DSC 1	51.4513
Cp		558.402	51.4429	0.335601	DSC 1	51.4575
Cp		558.9	51.4555	0.335601	DSC 1	51.4636
Cp		559.398	51.4686	0.335601	DSC 1	51.4698
Cp		559.897	51.48	0.335601	DSC 1	51.4759
Cp		560.395	51.4897	0.335601	DSC 1	51.482
Cp		560.893	51.4992	0.335601	DSC 1	51.4881
Cp		561.392	51.5098	0.335601	DSC 1	51.4942
Cp		561.89	51.5217	0.335601	DSC 1	51.5003
Cp		562.388	51.5331	0.335601	DSC 1	51.5064
Cp		562.886	51.544	0.335601	DSC 1	51.5124
Cp		563.385	51.5545	0.335601	DSC 1	51.5185
Cp		563.883	51.564	0.335601	DSC 1	51.5245
Cp		564.381	51.5736	0.335601	DSC 1	51.5305
Cp		564.88	51.5843	0.335601	DSC 1	51.5365
Cp		565.378	51.5953	0.335601	DSC 1	51.5425
Cp		565.876	51.6036	0.335601	DSC 1	51.5484
Cp		566.375	51.6134	0.335601	DSC 1	51.5544
Cp		566.873	51.6217	0.335601	DSC 1	51.5603
Cp		567.371	51.6296	0.335601	DSC 1	51.5662
Cp		567.87	51.6381	0.335601	DSC 1	51.5721
Cp		568.368	51.6462	0.335601	DSC 1	51.578
Cp		568.866	51.6556	0.335601	DSC 1	51.5839
Cp		569.364	51.6654	0.335601	DSC 1	51.5898
Cp		569.863	51.6758	0.335601	DSC 1	51.5956
Cp		570.361	51.687	0.335601	DSC 1	51.6015
Cp		570.859	51.6975	0.335601	DSC 1	51.6073
Cp		571.358	51.7092	0.335601	DSC 1	51.6131
Cp		571.856	51.7214	0.335601	DSC 1	51.6189
Cp		572.354	51.7345	0.335601	DSC 1	51.6247
Cp		572.853	51.7486	0.335601	DSC 1	51.6305
Cp		573.351	51.7624	0.335601	DSC 1	51.6362
Cp		573.849	51.7763	0.335601	DSC 1	51.642
Cp		574.348	51.7889	0.335601	DSC 1	51.6477
Cp		574.846	51.802	0.335601	DSC 1	51.6534
Cp		575.344	51.8165	0.335601	DSC 1	51.6591
Cp		575.843	51.8322	0.335601	DSC 1	51.6648
Cp		576.341	51.8492	0.335601	DSC 1	51.6705
Cp		576.839	51.8661	0.335601	DSC 1	51.6762
Cp		577.337	51.8805	0.335601	DSC 1	51.6818
Cp		577.836	51.8933	0.335601	DSC 1	51.6875
Cp		578.334	51.907	0.335601	DSC 1	51.6931
Cp		578.832	51.9222	0.335601	DSC 1	51.6987
Cp		579.331	51.9374	0.335601	DSC 1	51.7043
Cp		579.829	51.9512	0.335601	DSC 1	51.7099
Cp		580.327	51.9637	0.335601	DSC 1	51.7155
Cp		580.826	51.976	0.335601	DSC 1	51.721
Cp		581.324	51.9889	0.335601	DSC 1	51.7266
Cp		581.822	52.0022	0.335601	DSC 1	51.7321
Cp		582.321	52.016	0.335601	DSC 1	51.7376
Cp		582.819	52.0299	0.335601	DSC 1	51.7431
Cp		583.317	52.0445	0.335601	DSC 1	51.7486
Cp		583.815	52.0576	0.335601	DSC 1	51.7541
Cp		584.314	52.0706	0.335601	DSC 1	51.7596
Cp		584.812	52.0823	0.335601	DSC 1	51.7651
Cp		585.31	52.0923	0.333333	DSC 1	51.7705
Cp		585.809	52.1034	0.333333	DSC 1	51.7759
Cp		586.307	52.1159	0.333333	DSC 1	51.7814
Cp		586.805	52.1298	0.333333	DSC 1	51.7868
Cp		587.304	52.143	0.333333	DSC 1	51.7922
Cp		587.802	52.1549	0.333333	DSC 1	51.7976
Cp		588.3	52.1666	0.333333	DSC 1	51.8029
Cp		588.799	52.1765	0.333333	DSC 1	51.8083
Cp		589.297	52.1868	0.333333	DSC 1	51.8136
Cp		589.795	52.1977	0.333333	DSC 1	51.819
Cp		590.294	52.2083	0.333333	DSC 1	51.8243
Cp		590.792	52.2183	0.333333	DSC 1	51.8296
Cp		591.29	52.2282	0.333333	DSC 1	51.8349
Cp		591.788	52.2367	0.333333	DSC 1	51.8402
Cp		592.287	52.2444	0.333333	DSC 1	51.8455
Cp		592.785	52.2532	0.333333	DSC 1	51.8507
Cp		593.283	52.2628	0.333333	DSC 1	51.856
Cp		593.782	52.273	0.333333	DSC 1	51.8612
Cp		594.28	52.2829	0.333333	DSC 1	51.8665
Cp		594.778	52.2921	0.333333	DSC 1	51.8717
Cp		595.277	52.3008	0.333333	DSC 1	51.8769
Cp		595.775	52.3079	0.333333	DSC 1	51.8821
Cp		596.273	52.3146	0.333333	DSC 1	51.8873
Cp		596.772	52.3211	0.333333	DSC 1	51.8924
Cp		597.27	52.3261	0.333333	DSC 1	51.8976
Cp		597.768	52.3318	0.333333	DSC 1	51.9027
Cp		598.266	52.3387	0.333333	DSC 1	51.9079
Cp		598.765	52.3444	0.333333	DSC 1	51.913
Cp		599.263	52.3464	0.333333	DSC 1	51.9181
Cp		599.761	52.353	0.333333	DSC 1	51.9232
Cp		600.26	52.3616	0.333333	DSC 1	51.9283
Cp		600.758	52.3719	0.333333	DSC 1	51.9334
Cp		601.256	52.382	0.333333	DSC 1	51.9384
Cp		601.755	52.3943	0.333333	DSC 1	51.9435
Cp		602.253	52.4072	0.333333	DSC 1	51.9485
Cp		602.751	52.418	0.333333	DSC 1	51.9536
Cp		603.25	52.4275	0.333333	DSC 1	51.9586
Cp		603.748	52.4404	0.333333	DSC 1	51.9636
Cp		604.246	52.4535	0.333333	DSC 1	51.9686
Cp		604.745	52.4659	0.333333	DSC 1	51.9736
Cp		605.243	52.4775	0.333333	DSC 1	51.9786
Cp		605.741	52.4894	0.333333	DSC 1	51.9835
Cp		606.239	52.499	0.333333	DSC 1	51.9885
Cp		606.738	52.5079	0.333333	DSC 1	51.9934
Cp		607.236	52.517	0.333333	DSC 1	51.9984
Cp		607.734	52.5263	0.333333	DSC 1	52.0033
Cp		608.233	52.5353	0.333333	DSC 1	52.0082
Cp		608.731	52.5435	0.333333	DSC 1	52.0131
Cp		609.229	52.5507	0.333333	DSC 1	52.018
Cp		609.728	52.5551	0.333333	DSC 1	52.0228
Cp		610.226	52.5581	0.333333	DSC 1	52.0277
Cp		610.724	52.5634	0.333333	DSC 1	52.0326
Cp		611.223	52.5703	0.333333	DSC 1	52.0374
Cp		611.721	52.578	0.333333	DSC 1	52.0423
Cp		612.219	52.5849	0.333333	DSC 1	52.0471
Cp		612.717	52.5919	0.333333	DSC 1	52.0519
Cp		613.216	52.5989	0.333333	DSC 1	52.0567
Cp		613.714	52.6059	0.333333	DSC 1	52.0615
Cp		614.212	52.614	0.333333	DSC 1	52.0663
Cp		614.711	52.6219	0.333333	DSC 1	52.071
Cp		615.209	52.63	0.333333	DSC 1	52.0758
Cp		615.707	52.6353	0.333333	DSC 1	52.0805
Cp		616.206	52.6409	0.333333	DSC 1	52.0853
Cp		616.704	52.6455	0.333333	DSC 1	52.09
Cp		617.202	52.6493	0.333333	DSC 1	52.0947
Cp		617.701	52.6538	0.333333	DSC 1	52.0994
Cp		618.199	52.6598	0.333333	DSC 1	52.1041
Cp		618.697	52.6658	0.333333	DSC 1	52.1088
Cp		619.195	52.6751	0.333333	DSC 1	52.1135
Cp		619.694	52.684	0.333333	DSC 1	52.1182
Cp		620.192	52.6909	0.333333	DSC 1	52.1228
Cp		620.69	52.6982	0.333333	DSC 1	52.1275
Cp		621.189	52.7077	0.333333	DSC 1	52.1321
Cp		621.687	52.7148	0.335601	DSC 1	52.1367
Cp		622.185	52.7217	0.335601	DSC 1	52.1414
Cp		622.684	52.7273	0.335601	DSC 1	52.146
Cp		623.182	52.7329	0.335601	DSC 1	52.1506
Cp		623.68	52.7359	0.335601	DSC 1	52.1551
Cp		624.179	52.7382	0.335601	DSC 1	52.1597
Cp		624.677	52.7428	0.335601	DSC 1	52.1643
Cp		625.175	52.7477	0.335601	DSC 1	52.1688
Cp		625.674	52.754	0.335601	DSC 1	52.1734
Cp		626.172	52.76	0.335601	DSC 1	52.1779
Cp		626.67	52.7672	0.335601	DSC 1	52.1825
Cp		627.168	52.7741	0.335601	DSC 1	52.187
Cp		627.667	52.7807	0.335601	DSC 1	52.1915
Cp		628.165	52.788	0.335601	DSC 1	52.196
Cp		628.663	52.7966	0.335601	DSC 1	52.2005
Cp		629.162	52.8063	0.335601	DSC 1	52.2049
Cp		629.66	52.8156	0.335601	DSC 1	52.2094
Cp		630.158	52.8245	0.335601	DSC 1	52.2139
Cp		630.657	52.8322	0.335601	DSC 1	52.2183
Cp		631.155	52.841	0.335601	DSC 1	52.2228
Cp		631.653	52.8482	0.335601	DSC 1	52.2272
Cp		632.152	52.8526	0.335601	DSC 1	52.2316
Cp		632.65	52.8582	0.335601	DSC 1	52.236
Cp		633.148	52.8638	0.335601	DSC 1	52.2404
Cp		633.646	52.8721	0.335601	DSC 1	52.2448
Cp		634.145	52.8743	0.335601	DSC 1	52.2492
Cp		634.643	52.8753	0.335601	DSC 1	52.2536
Cp		635.141	52.8784	0.335601	DSC 1	52.2579
Cp		635.64	52.8843	0.335601	DSC 1	52.2623
Cp		636.138	52.8912	0.335601	DSC 1	52.2666
Cp		636.636	52.8986	0.335601	DSC 1	52.271
Cp		637.135	52.9063	0.335601	DSC 1	52.2753
Cp		637.633	52.9139	0.335601	DSC 1	52.2796
Cp		638.131	52.9196	0.335601	DSC 1	52.2839
Cp		638.63	52.925	0.335601	DSC 1	52.2882
Cp		639.128	52.93	0.335601	DSC 1	52.2925
Cp		639.626	52.9337	0.335601	DSC 1	52.2968
Cp		640.125	52.9376	0.335601	DSC 1	52.3011
Cp		640.623	52.9397	0.335601	DSC 1	52.3053
Cp		641.121	52.9407	0.335601	DSC 1	52.3096
Cp		641.619	52.9419	0.335601	DSC 1	52.3138
Cp		642.118	52.9426	0.335601	DSC 1	52.3181
Cp		642.616	52.9441	0.335601	DSC 1	52.3223
Cp		643.114	52.9443	0.335601	DSC 1	52.3265
Cp		643.613	52.9442	0.335601	DSC 1	52.3307
Cp		644.111	52.9455	0.335601	DSC 1	52.3349
Cp		644.609	52.945	0.335601	DSC 1	52.3391
Cp		645.108	52.9468	0.335601	DSC 1	52.3433
Cp		645.606	52.9479	0.335601	DSC 1	52.3475
Cp		646.104	52.9499	0.335601	DSC 1	52.3516
Cp		646.603	52.952	0.335601	DSC 1	52.3558
Cp		647.101	52.954	0.335601	DSC 1	52.3599
Cp		647.599	52.9561	0.335601	DSC 1	52.3641
Cp		648.097	52.9578	0.335601	DSC 1	52.3682
Cp		648.596	52.958	0.335601	DSC 1	52.3723
Cp		649.094	52.9571	0.335601	DSC 1	52.3764
Cp		649.592	52.9572	0.335601	DSC 1	52.3805
Cp		650.091	52.9587	0.335601	DSC 1	52.3846
Cp		650.589	52.9616	0.335601	DSC 1	52.3887
Cp		651.087	52.9645	0.335601	DSC 1	52.3928
Cp		651.586	52.9683	0.335601	DSC 1	52.3969
Cp		652.084	52.9731	0.335601	DSC 1	52.4009
Cp		652.582	52.9763	0.335601	DSC 1	52.405
Cp		653.081	52.9806	0.335601	DSC 1	52.409
Cp		653.579	52.9881	0.335601	DSC 1	52.4131
Cp		654.077	52.9955	0.335601	DSC 1	52.4171
Cp		654.576	53.0022	0.335601	DSC 1	52.4211
Cp		655.074	53.0083	0.335601	DSC 1	52.4251
Cp		655.572	53.0126	0.335601	DSC 1	52.4291
Cp		656.07	53.0167	0.335601	DSC 1	52.4331
Cp		656.569	53.0198	0.335601	DSC 1	52.4371
Cp		657.067	53.0237	0.335601	DSC 1	52.4411
Cp		657.565	53.0277	0.335601	DSC 1	52.445
Cp		658.064	53.0326	0.333333	DSC 1	52.449
Cp		658.562	53.0385	0.333333	DSC 1	52.453
Cp		659.06	53.0436	0.333333	DSC 1	52.4569
Cp		659.559	53.0475	0.333333	DSC 1	52.4608
Cp		660.057	53.0534	0.333333	DSC 1	52.4648
Cp		660.555	53.0599	0.333333	DSC 1	52.4687
Cp		661.054	53.0658	0.333333	DSC 1	52.4726
Cp		661.552	53.0705	0.333333	DSC 1	52.4765
Cp		662.05	53.0739	0.333333	DSC 1	52.4804
Cp		662.548	53.077	0.333333	DSC 1	52.4843
Cp		663.047	53.0798	0.333333	DSC 1	52.4882
Cp		663.545	53.0846	0.333333	DSC 1	52.492
Cp		664.043	53.0909	0.333333	DSC 1	52.4959
Cp		664.542	53.0965	0.333333	DSC 1	52.4997
Cp		665.04	53.1009	0.333333	DSC 1	52.5036
Cp		665.538	53.1043	0.333333	DSC 1	52.5074
Cp		666.037	53.1079	0.333333	DSC 1	52.5113
Cp		666.535	53.1111	0.333333	DSC 1	52.5151
Cp		667.033	53.1146	0.333333	DSC 1	52.5189
Cp		667.532	53.1182	0.333333	DSC 1	52.5227
Cp		668.03	53.1217	0.333333	DSC 1	52.5265
Cp		668.528	53.1264	0.333333	DSC 1	52.5303
Cp		669.026	53.1343	0.333333	DSC 1	52.5341
Cp		669.525	53.1424	0.333333	DSC 1	52.5378
Cp		670.023	53.1504	0.333333	DSC 1	52.5416
Cp		670.521	53.1592	0.333333	DSC 1	52.5454
Cp		671.02	53.1713	0.333333	DSC 1	52.5491
Cp		671.518	53.1825	0.333333	DSC 1	52.5529
Cp		672.016	53.1908	0.333333	DSC 1	52.5566
Cp		672.515	53.1975	0.333333	DSC 1	52.5603
Cp		673.013	53.2028	0.333333	DSC 1	52.5641
Cp		673.511	53.206	0.333333	DSC 1	52.5678
Cp		674.01	53.2069	0.333333	DSC 1	52.5715
Cp		674.508	53.209	0.333333	DSC 1	52.5752
Cp		675.006	53.2113	0.333333	DSC 1	52.5789
Cp		675.505	53.2145	0.333333	DSC 1	52.5826
Cp		676.003	53.2159	0.333333	DSC 1	52.5862
Cp		676.501	53.215	0.333333	DSC 1	52.5899
Cp		676.999	53.212	0.333333	DSC 1	52.5936
Cp		677.498	53.207	0.333333	DSC 1	52.5972
Cp		677.996	53.203	0.333333	DSC 1	52.6009
Cp		678.494	53.2031	0.333333	DSC 1	52.6045
Cp		678.993	53.2043	0.333333	DSC 1	52.6081
Cp		679.491	53.2081	0.333333	DSC 1	52.6118
Cp		679.989	53.2142	0.333333	DSC 1	52.6154
Cp		680.488	53.2214	0.333333	DSC 1	52.619
Cp		680.986	53.2273	0.333333	DSC 1	52.6226
Cp		681.484	53.2307	0.333333	DSC 1	52.6262
Cp		681.983	53.2307	0.333333	DSC 1	52.6298
Cp		682.481	53.2267	0.333333	DSC 1	52.6334
Cp		682.979	53.2211	0.333333	DSC 1	52.6369
Cp		683.477	53.214	0.333333	DSC 1	52.6405
Cp		683.976	53.2064	0.333333	DSC 1	52.6441
Cp		684.474	53.1996	0.333333	DSC 1	52.6476
Cp		684.972	53.194	0.333333	DSC 1	52.6512
Cp		685.471	53.1901	0.333333	DSC 1	52.6547
Cp		685.969	53.1893	0.333333	DSC 1	52.6582
Cp		686.467	53.1926	0.333333	DSC 1	52.6618
Cp		686.966	53.1989	0.333333	DSC 1	52.6653
Cp		687.464	53.2052	0.333333	DSC 1	52.6688
Cp		687.962	53.2125	0.333333	DSC 1	52.6723
Cp		688.461	53.2202	0.333333	DSC 1	52.6758
Cp		688.959	53.2288	0.333333	DSC 1	52.6793
Cp		689.457	53.2372	0.333333	DSC 1	52.6828
Cp		689.956	53.245	0.333333	DSC 1	52.6862
Cp		690.454	53.2529	0.333333	DSC 1	52.6897
Cp		690.952	53.259	0.333333	DSC 1	52.6932
Cp		691.45	53.2637	0.333333	DSC 1	52.6966
Cp		691.949	53.2689	0.333333	DSC 1	52.7001
Cp		692.447	53.273	0.333333	DSC 1	52.7035
Cp		692.945	53.2781	0.333333	DSC 1	52.7069
Cp		693.444	53.2848	0.333333	DSC 1	52.7104
Cp		693.942	53.2935	0.333333	DSC 1	52.7138
Cp		694.44	53.301	0.573643	DSC 1	52.7172
Cp		694.939	53.3064	0.573643	DSC 1	52.7206
Cp		695.437	53.3109	0.573643	DSC 1	52.724
Cp		695.935	53.3164	0.573643	DSC 1	52.7274
Cp		696.434	53.3227	0.573643	DSC 1	52.7308
Cp		696.932	53.3304	0.573643	DSC 1	52.7342
Cp		697.43	53.3385	0.573643	DSC 1	52.7375
Cp		697.928	53.3468	0.573643	DSC 1	52.7409
Cp		698.427	53.354	0.573643	DSC 1	52.7443
Cp		698.925	53.3596	0.573643	DSC 1	52.7476
Cp		699.423	53.3632	0.573643	DSC 1	52.751
Cp		699.922	53.3674	0.573643	DSC 1	52.7543
Cp		700.42	53.3715	0.573643	DSC 1	52.7576
Cp		700.918	53.3732	0.573643	DSC 1	52.761
Cp		701.417	53.3734	0.573643	DSC 1	52.7643
Cp		701.915	53.372	0.573643	DSC 1	52.7676
Cp		702.413	53.3689	0.573643	DSC 1	52.7709
Cp		702.912	53.3692	0.573643	DSC 1	52.7742
Cp		703.41	53.3715	0.573643	DSC 1	52.7775
Cp		703.908	53.3727	0.573643	DSC 1	52.7808
Cp		704.407	53.3731	0.573643	DSC 1	52.7841
Cp		704.905	53.3727	0.573643	DSC 1	52.7873
Cp		705.403	53.3725	0.573643	DSC 1	52.7906
Cp		705.901	53.3725	0.573643	DSC 1	52.7939
Cp		706.4	53.3729	0.573643	DSC 1	52.7971
Cp		706.898	53.3745	0.573643	DSC 1	52.8004
Cp		707.396	53.3772	0.573643	DSC 1	52.8036
Cp		707.895	53.3793	0.573643	DSC 1	52.8068
Cp		708.393	53.3808	0.573643	DSC 1	52.8101
Cp		708.891	53.3841	0.573643	DSC 1	52.8133
Cp		709.39	53.3867	0.573643	DSC 1	52.8165
Cp		709.888	53.3894	0.573643	DSC 1	52.8197
Cp		710.386	53.3954	0.573643	DSC 1	52.8229
Cp		710.885	53.4016	0.573643	DSC 1	52.8261
Cp		711.383	53.4064	0.573643	DSC 1	52.8293
Cp		711.881	53.4081	0.573643	DSC 1	52.8325
Cp		712.379	53.4081	0.573643	DSC 1	52.8357
Cp		712.878	53.4073	0.573643	DSC 1	52.8389
Cp		713.376	53.4076	0.573643	DSC 1	52.842
Cp		713.874	53.4077	0.573643	DSC 1	52.8452
Cp		714.373	53.408	0.573643	DSC 1	52.8483
Cp		714.871	53.4086	0.573643	DSC 1	52.8515
Cp		715.369	53.4076	0.573643	DSC 1	52.8546
Cp		715.868	53.4076	0.573643	DSC 1	52.8578
Cp		716.366	53.407	0.573643	DSC 1	52.8609
Cp		716.864	53.4089	0.573643	DSC 1	52.864
Cp		717.363	53.415	0.573643	DSC 1	52.8671
Cp		717.861	53.4217	0.573643	DSC 1	52.8703
Cp		718.359	53.4276	0.573643	DSC 1	52.8734
Cp		718.857	53.4321	0.573643	DSC 1	52.8765
Cp		719.356	53.4347	0.573643	DSC 1	52.8796
Cp		719.854	53.4329	0.573643	DSC 1	52.8826
Cp		720.352	53.4282	0.573643	DSC 1	52.8857
Cp		720.851	53.4259	0.573643	DSC 1	52.8888
Cp		721.349	53.4231	0.573643	DSC 1	52.8919
Cp		721.847	53.4206	0.573643	DSC 1	52.8949
Cp		722.346	53.42	0.573643	DSC 1	52.898
Cp		722.844	53.4223	0.573643	DSC 1	52.9011
Cp		723.342	53.4257	0.573643	DSC 1	52.9041
Cp		723.841	53.4296	0.573643	DSC 1	52.9071
Cp		724.339	53.4328	0.573643	DSC 1	52.9102
Cp		724.837	53.4379	0.573643	DSC 1	52.9132
Cp		725.336	53.4431	0.573643	DSC 1	52.9162
Cp		725.834	53.4451	0.573643	DSC 1	52.9192
Cp		726.332	53.4461	0.573643	DSC 1	52.9223
Cp		726.83	53.4461	0.573643	DSC 1	52.9253
Cp		727.329	53.4483	0.573643	DSC 1	52.9283
Cp		727.827	53.4532	0.573643	DSC 1	52.9313
Cp		728.325	53.4605	0.573643	DSC 1	52.9343
Cp		728.824	53.466	0.573643	DSC 1	52.9372
Cp		729.322	53.4706	0.573643	DSC 1	52.9402
Cp		729.82	53.4745	0.573643	DSC 1	52.9432
Cp		730.319	53.4754	0.573643	DSC 1	52.9462
Cp		730.817	53.4742	0.675799	DSC 1	52.9491
Cp		731.315	53.4744	0.675799	DSC 1	52.9521
Cp		731.814	53.4761	0.675799	DSC 1	52.955
Cp		732.312	53.481	0.675799	DSC 1	52.958
Cp		732.81	53.4865	0.675799	DSC 1	52.9609
Cp		733.308	53.4902	0.675799	DSC 1	52.9638
Cp		733.807	53.4901	0.675799	DSC 1	52.9668
Cp		734.305	53.4879	0.675799	DSC 1	52.9697
Cp		734.803	53.4875	0.675799	DSC 1	52.9726
Cp		735.302	53.4886	0.675799	DSC 1	52.9755
Cp		735.8	53.4925	0.675799	DSC 1	52.9784
Cp		736.298	53.4983	0.675799	DSC 1	52.9813
Cp		736.797	53.5028	0.675799	DSC 1	52.9842
Cp		737.295	53.5059	0.675799	DSC 1	52.9871
Cp		737.793	53.5083	0.675799	DSC 1	52.99
Cp		738.292	53.5093	0.675799	DSC 1	52.9929
Cp		738.79	53.5109	0.675799	DSC 1	52.9957
Cp		739.288	53.5145	0.675799	DSC 1	52.9986
Cp		739.787	53.5215	0.675799	DSC 1	53.0015
Cp		740.285	53.5288	0.675799	DSC 1	53.0043
Cp		740.783	53.5326	0.675799	DSC 1	53.0072
Cp		741.281	53.5328	0.675799	DSC 1	53.01
Cp		741.78	53.5364	0.675799	DSC 1	53.0129
Cp		742.278	53.5435	0.675799	DSC 1	53.0157
Cp		742.776	53.5512	0.675799	DSC 1	53.0185
Cp		743.275	53.5573	0.675799	DSC 1	53.0213
Cp		743.773	53.5615	0.675799	DSC 1	53.0242
Cp		744.271	53.5638	0.675799	DSC 1	53.027
Cp		744.77	53.5638	0.675799	DSC 1	53.0298
Cp		745.268	53.564	0.675799	DSC 1	53.0326
Cp		745.766	53.5667	0.675799	DSC 1	53.0354
Cp		746.265	53.5745	0.675799	DSC 1	53.0382
Cp		746.763	53.5814	0.675799	DSC 1	53.041
Cp		747.261	53.5902	0.675799	DSC 1	53.0437
Cp		747.759	53.5969	0.675799	DSC 1	53.0465
Cp		748.258	53.6027	0.675799	DSC 1	53.0493
Cp		748.756	53.6084	0.675799	DSC 1	53.0521
Cp		749.254	53.6136	0.675799	DSC 1	53.0548
Cp		749.753	53.6205	0.675799	DSC 1	53.0576
Cp		750.251	53.6263	0.675799	DSC 1	53.0603
Cp		750.749	53.6288	0.675799	DSC 1	53.0631
Cp		751.248	53.6272	0.675799	DSC 1	53.0658
Cp		751.746	53.6249	0.675799	DSC 1	53.0686
Cp		752.244	53.6246	0.675799	DSC 1	53.0713
Cp		752.743	53.624	0.675799	DSC 1	53.074
Cp		753.241	53.6263	0.675799	DSC 1	53.0767
Cp		753.739	53.6287	0.675799	DSC 1	53.0795
Cp		754.237	53.6317	0.675799	DSC 1	53.0822
Cp		754.736	53.6336	0.675799	DSC 1	53.0849
Cp		755.234	53.6341	0.675799	DSC 1	53.0876
Cp		755.732	53.6365	0.675799	DSC 1	53.0903
Cp		756.231	53.6394	0.675799	DSC 1	53.093
Cp		756.729	53.6408	0.675799	DSC 1	53.0956
Cp		757.227	53.6407	0.675799	DSC 1	53.0983
Cp		757.726	53.641	0.675799	DSC 1	53.101
Cp		758.224	53.6396	0.675799	DSC 1	53.1037
Cp		758.722	53.6377	0.675799	DSC 1	53.1063
Cp		759.221	53.6367	0.675799	DSC 1	53.109
Cp		759.719	53.6382	0.675799	DSC 1	53.1117
Cp		760.217	53.6429	0.675799	DSC 1	53.1143
Cp		760.716	53.648	0.675799	DSC 1	53.117
Cp		761.214	53.6517	0.675799	DSC 1	53.1196
Cp		761.712	53.6542	0.675799	DSC 1	53.1222
Cp		762.21	53.6538	0.675799	DSC 1	53.1249
Cp		762.709	53.6505	0.675799	DSC 1	53.1275
Cp		763.207	53.6507	0.675799	DSC 1	53.1301
Cp		763.705	53.6524	0.675799	DSC 1	53.1327
Cp		764.204	53.6538	0.675799	DSC 1	53.1353
Cp		764.702	53.654	0.675799	DSC 1	53.1379
Cp		765.2	53.6579	0.675799	DSC 1	53.1406
Cp		765.699	53.6623	0.675799	DSC 1	53.1431
Cp		766.197	53.6688	0.675799	DSC 1	53.1457
Cp		766.695	53.6757	0.675799	DSC 1	53.1483
Cp		767.194	53.6793	0.747475	DSC 1	53.1509
Cp		767.692	53.6803	0.747475	DSC 1	53.1535
Cp		768.19	53.6805	0.747475	DSC 1	53.1561
Cp		768.688	53.6808	0.747475	DSC 1	53.1586
Cp		769.187	53.6796	0.747475	DSC 1	53.1612
Cp		769.685	53.681	0.747475	DSC 1	53.1638
Cp		770.183	53.6844	0.747475	DSC 1	53.1663
Cp		770.682	53.6882	0.747475	DSC 1	53.1689
Cp		771.18	53.6928	0.747475	DSC 1	53.1714
Cp		771.678	53.6973	0.747475	DSC 1	53.174
Cp		772.177	53.7026	0.747475	DSC 1	53.1765
Cp		772.675	53.7033	0.747475	DSC 1	53.179
Cp		773.173	53.7009	0.747475	DSC 1	53.1816
Cp		773.672	53.6991	0.747475	DSC 1	53.1841
Cp		774.17	53.6959	0.747475	DSC 1	53.1866
Cp		774.668	53.6942	0.747475	DSC 1	53.1891
Cp		775.167	53.6955	0.747475	DSC 1	53.1916
Cp		775.665	53.7001	0.747475	DSC 1	53.1941
Cp		776.163	53.7041	0.747475	DSC 1	53.1966
Cp		776.661	53.7071	0.747475	DSC 1	53.1991
Cp		777.16	53.7105	0.747475	DSC 1	53.2016
Cp		777.658	53.7137	0.747475	DSC 1	53.2041
Cp		778.156	53.7178	0.747475	DSC 1	53.2066
Cp		778.655	53.7213	0.747475	DSC 1	53.2091
Cp		779.153	53.7253	0.747475	DSC 1	53.2115
Cp		779.651	53.7271	0.747475	DSC 1	53.214
Cp		780.15	53.7273	0.747475	DSC 1	53.2165
Cp		780.648	53.7308	0.747475	DSC 1	53.2189
Cp		781.146	53.7347	0.747475	DSC 1	53.2214
Cp		781.645	53.7411	0.747475	DSC 1	53.2239
Cp		782.143	53.7459	0.747475	DSC 1	53.2263
Cp		782.641	53.7511	0.747475	DSC 1	53.2287
Cp		783.139	53.7556	0.747475	DSC 1	53.2312
Cp		783.638	53.7592	0.747475	DSC 1	53.2336
Cp		784.136	53.764	0.747475	DSC 1	53.236
Cp		784.634	53.7695	0.747475	DSC 1	53.2385
Cp		785.133	53.7771	0.747475	DSC 1	53.2409
Cp		785.631	53.7882	0.747475	DSC 1	53.2433
Cp		786.129	53.7956	0.747475	DSC 1	53.2457
Cp		786.628	53.7999	0.747475	DSC 1	53.2481
Cp		787.126	53.8013	0.747475	DSC 1	53.2505
Cp		787.624	53.8042	0.747475	DSC 1	53.2529
Cp		788.123	53.8077	0.747475	DSC 1	53.2553
Cp		788.621	53.8128	0.747475	DSC 1	53.2577
Cp		789.119	53.8173	0.747475	DSC 1	53.2601
Cp		789.618	53.8245	0.747475	DSC 1	53.2625
Cp		790.116	53.8299	0.747475	DSC 1	53.2649
Cp		790.614	53.8322	0.747475	DSC 1	53.2672
Cp		791.112	53.8314	0.747475	DSC 1	53.2696
Cp		791.611	53.8294	0.747475	DSC 1	53.272
Cp		792.109	53.8307	0.747475	DSC 1	53.2743
Cp		792.607	53.8321	0.747475	DSC 1	53.2767
Cp		793.106	53.8331	0.747475	DSC 1	53.2791
Cp		793.604	53.8355	0.747475	DSC 1	53.2814
Cp		794.102	53.8376	0.747475	DSC 1	53.2837
Cp		794.601	53.8403	0.747475	DSC 1	53.2861
Cp		795.099	53.8435	0.747475	DSC 1	53.2884
Cp		795.597	53.8439	0.747475	DSC 1	53.2908
Cp		796.096	53.8425	0.747475	DSC 1	53.2931
Cp		796.594	53.8397	0.747475	DSC 1	53.2954
Cp		797.092	53.8402	0.747475	DSC 1	53.2977
Cp		797.59	53.8406	0.747475	DSC 1	53.3
Cp		798.089	53.841	0.747475	DSC 1	53.3024
Cp		798.587	53.8413	0.747475	DSC 1	53.3047
Cp		799.085	53.8394	0.747475	DSC 1	53.307
Cp		799.584	53.8393	0.747475	DSC 1	53.3093
Cp		333.674	47.2509	0	DSC 2	46.0206
Cp		334.161	47.2831	0	DSC 2	46.0422
Cp		334.648	47.3134	0	DSC 2	46.0638
Cp		335.134	47.3422	0	DSC 2	46.0852
Cp		335.621	47.37	0	DSC 2	46.1066
Cp		336.108	47.3981	0	DSC 2	46.1279
Cp		336.595	47.4259	0	DSC 2	46.1492
Cp		337.082	47.4546	0	DSC 2	46.1704
Cp		337.569	47.4814	0	DSC 2	46.1915
Cp		338.055	47.5059	0	DSC 2	46.2125
Cp		338.542	47.5285	0	DSC 2	46.2335
Cp		339.029	47.5508	0	DSC 2	46.2544
Cp		339.516	47.5743	0	DSC 2	46.2753
Cp		340.003	47.6001	0	DSC 2	46.296
Cp		340.49	47.6259	0	DSC 2	46.3168
Cp		340.976	47.6499	0	DSC 2	46.3374
Cp		341.463	47.672	0	DSC 2	46.358
Cp		341.95	47.6928	0	DSC 2	46.3785
Cp		342.437	47.7134	0	DSC 2	46.3989
Cp		342.924	47.7341	0	DSC 2	46.4193
Cp		343.411	47.7542	0	DSC 2	46.4396
Cp		343.897	47.7748	0	DSC 2	46.4598
Cp		344.384	47.7943	0	DSC 2	46.48
Cp		344.871	47.8107	0	DSC 2	46.5001
Cp		345.358	47.8242	0	DSC 2	46.5201
Cp		345.845	47.8355	0	DSC 2	46.5401
Cp		346.332	47.8466	0	DSC 2	46.56
Cp		346.818	47.858	0	DSC 2	46.5799
Cp		347.305	47.8705	0	DSC 2	46.5997
Cp		347.792	47.8824	0	DSC 2	46.6194
Cp		348.279	47.8933	0	DSC 2	46.6391
Cp		348.766	47.9028	0	DSC 2	46.6587
Cp		349.253	47.9119	0	DSC 2	46.6782
Cp		349.739	47.9226	0	DSC 2	46.6977
Cp		350.226	47.9367	0	DSC 2	46.7171
Cp		350.713	47.9543	0	DSC 2	46.7364
Cp		351.2	47.9736	0	DSC 2	46.7557
Cp		351.687	47.9945	0	DSC 2	46.7749
Cp		352.174	48.0154	0	DSC 2	46.7941
Cp		352.66	48.0357	0	DSC 2	46.8132
Cp		353.147	48.0554	0	DSC 2	46.8322
Cp		353.634	48.0753	0	DSC 2	46.8512
Cp		354.121	48.0972	0	DSC 2	46.8701
Cp		354.608	48.121	0	DSC 2	46.889
Cp		355.095	48.144	0	DSC 2	46.9078
Cp		355.582	48.1643	0	DSC 2	46.9265
Cp		356.068	48.182	0	DSC 2	46.9452
Cp		356.555	48.1965	0	DSC 2	46.9638
Cp		357.042	48.2111	0	DSC 2	46.9824
Cp		357.529	48.2259	0	DSC 2	47.0009
Cp		358.016	48.2411	0	DSC 2	47.0193
Cp		358.503	48.2561	0	DSC 2	47.0377
Cp		358.989	48.2713	0	DSC 2	47.056
Cp		359.476	48.2868	0	DSC 2	47.0743
Cp		359.963	48.3022	0	DSC 2	47.0925
Cp		360.45	48.3181	0	DSC 2	47.1106
Cp		360.937	48.334	0	DSC 2	47.1287
Cp		361.424	48.3533	0	DSC 2	47.1468
Cp		361.91	48.3746	0	DSC 2	47.1648
Cp		362.397	48.3957	0	DSC 2	47.1827
Cp		362.884	48.4159	0	DSC 2	47.2006
Cp		363.371	48.4346	0	DSC 2	47.2184
Cp		363.858	48.4547	0	DSC 2	47.2361
Cp		364.345	48.4742	0	DSC 2	47.2538
Cp		364.831	48.4944	0	DSC 2	47.2715
Cp		365.318	48.5149	0	DSC 2	47.2891
Cp		365.805	48.5358	0	DSC 2	47.3066
Cp		366.292	48.5545	0	DSC 2	47.3241
Cp		366.779	48.5699	0	DSC 2	47.3415
Cp		367.266	48.5841	0	DSC 2	47.3589
Cp		367.752	48.5985	0	DSC 2	47.3762
Cp		368.239	48.6141	0	DSC 2	47.3935
Cp		368.726	48.6307	0	DSC 2	47.4107
Cp		369.213	48.6494	0	DSC 2	47.4278
Cp		369.7	48.6688	0	DSC 2	47.4449
Cp		370.187	48.689	0	DSC 2	47.462
Cp		370.673	48.7084	0	DSC 2	47.479
Cp		371.16	48.7286	0	DSC 2	47.4959
Cp		371.647	48.7499	0	DSC 2	47.5128
Cp		372.134	48.7731	0	DSC 2	47.5297
Cp		372.621	48.7976	0	DSC 2	47.5465
Cp		373.108	48.8204	0	DSC 2	47.5632
Cp		373.594	48.8388	0	DSC 2	47.5799
Cp		374.081	48.8531	0	DSC 2	47.5965
Cp		374.568	48.8653	0	DSC 2	47.6131
Cp		375.055	48.8762	0	DSC 2	47.6296
Cp		375.542	48.8879	0	DSC 2	47.6461
Cp		376.029	48.8999	0	DSC 2	47.6626
Cp		376.516	48.9124	0	DSC 2	47.6789
Cp		377.002	48.924	0	DSC 2	47.6953
Cp		377.489	48.9311	0	DSC 2	47.7115
Cp		377.976	48.9331	0	DSC 2	47.7278
Cp		378.463	48.9308	0	DSC 2	47.744
Cp		378.95	48.9277	0	DSC 2	47.7601
Cp		379.437	48.9258	0	DSC 2	47.7762
Cp		379.923	48.9249	0	DSC 2	47.7922
Cp		380.41	48.9211	0	DSC 2	47.8082
Cp		380.897	48.9176	0	DSC 2	47.8241
Cp		381.384	48.9149	0	DSC 2	47.84
Cp		381.871	48.9145	0	DSC 2	47.8558
Cp		382.358	48.9158	0	DSC 2	47.8716
Cp		382.844	48.9189	0	DSC 2	47.8874
Cp		383.331	48.9254	0	DSC 2	47.9031
Cp		383.818	48.9342	0	DSC 2	47.9187
Cp		384.305	48.9445	0	DSC 2	47.9343
Cp		384.792	48.9541	0	DSC 2	47.9499
Cp		385.279	48.9627	0	DSC 2	47.9654
Cp		385.765	48.9704	0	DSC 2	47.9808
Cp		386.252	48.9784	0	DSC 2	47.9962
Cp		386.739	48.9873	0	DSC 2	48.0116
Cp		387.226	48.9958	0	DSC 2	48.0269
Cp		387.713	49.0029	0	DSC 2	48.0422
Cp		388.2	49.0076	0	DSC 2	48.0574
Cp		388.686	49.0112	0	DSC 2	48.0726
Cp		389.173	49.014	0	DSC 2	48.0877
Cp		389.66	49.0174	0	DSC 2	48.1028
Cp		390.147	49.021	0	DSC 2	48.1179
Cp		390.634	49.023	0	DSC 2	48.1329
Cp		391.121	49.023	0	DSC 2	48.1478
Cp		391.607	49.0216	0	DSC 2	48.1627
Cp		392.094	49.0197	0	DSC 2	48.1776
Cp		392.581	49.0174	0	DSC 2	48.1924
Cp		393.068	49.0157	0	DSC 2	48.2072
Cp		393.555	49.0158	0	DSC 2	48.2219
Cp		394.042	49.018	0	DSC 2	48.2366
Cp		394.529	49.0202	0	DSC 2	48.2513
Cp		395.015	49.0203	0	DSC 2	48.2659
Cp		395.502	49.0172	0	DSC 2	48.2804
Cp		395.989	49.0106	0	DSC 2	48.2949
Cp		396.476	49.0024	0	DSC 2	48.3094
Cp		396.963	48.9937	0	DSC 2	48.3238
Cp		397.45	48.9891	0	DSC 2	48.3382
Cp		397.936	48.9888	0	DSC 2	48.3526
Cp		398.423	48.9913	0	DSC 2	48.3669
Cp		398.91	48.9934	0	DSC 2	48.3811
Cp		399.397	48.9961	0	DSC 2	48.3953
Cp		399.884	48.9989	0	DSC 2	48.4095
Cp		400.371	49.0029	3.52381	DSC 2	48.4237
Cp		400.857	49.0097	3.52381	DSC 2	48.4377
Cp		401.344	49.0201	3.52381	DSC 2	48.4518
Cp		401.831	49.0313	3.52381	DSC 2	48.4658
Cp		402.318	49.0396	3.52381	DSC 2	48.4798
Cp		402.805	49.0443	3.52381	DSC 2	48.4937
Cp		403.292	49.0449	3.52381	DSC 2	48.5076
Cp		403.778	49.0441	0.333333	DSC 2	48.5214
Cp		404.265	49.045	0.333333	DSC 2	48.5352
Cp		404.752	49.0482	0.333333	DSC 2	48.549
Cp		405.239	49.0541	0.333333	DSC 2	48.5627
Cp		405.726	49.0603	0.333333	DSC 2	48.5764
Cp		406.213	49.0664	0.333333	DSC 2	48.59
Cp		406.699	49.0728	0.333333	DSC 2	48.6036
Cp		407.186	49.0807	0.333333	DSC 2	48.6172
Cp		407.673	49.0904	0.333333	DSC 2	48.6307
Cp		408.16	49.1017	0.333333	DSC 2	48.6442
Cp		408.647	49.1153	0.333333	DSC 2	48.6576
Cp		409.134	49.1289	0.333333	DSC 2	48.6711
Cp		409.62	49.1411	0.333333	DSC 2	48.6844
Cp		410.107	49.1531	0.333333	DSC 2	48.6977
Cp		410.594	49.1649	0.333333	DSC 2	48.711
Cp		411.081	49.1783	0.333333	DSC 2	48.7243
Cp		411.568	49.1936	0.333333	DSC 2	48.7375
Cp		412.055	49.2084	0.333333	DSC 2	48.7507
Cp		412.541	49.2216	0.333333	DSC 2	48.7638
Cp		413.028	49.2333	0.333333	DSC 2	48.7769
Cp		413.515	49.2446	0.333333	DSC 2	48.79
Cp		414.002	49.2564	0.333333	DSC 2	48.803
Cp		414.489	49.2685	0.333333	DSC 2	48.816
Cp		414.976	49.2819	0.333333	DSC 2	48.8289
Cp		415.463	49.295	0.333333	DSC 2	48.8418
Cp		415.949	49.3092	0.333333	DSC 2	48.8547
Cp		416.436	49.3217	0.333333	DSC 2	48.8675
Cp		416.923	49.3313	0.333333	DSC 2	48.8803
Cp		417.41	49.3385	0.333333	DSC 2	48.8931
Cp		417.897	49.346	0.333333	DSC 2	48.9058
Cp		418.384	49.3554	0.333333	DSC 2	48.9185
Cp		418.87	49.366	0.333333	DSC 2	48.9312
Cp		419.357	49.3757	0.333333	DSC 2	48.9438
Cp		419.844	49.3833	0.333333	DSC 2	48.9563
Cp		420.331	49.3898	0.333333	DSC 2	48.9689
Cp		420.818	49.3963	0.333333	DSC 2	48.9814
Cp		421.305	49.4036	0.333333	DSC 2	48.9939
Cp		421.791	49.4121	0.333333	DSC 2	49.0063
Cp		422.278	49.4222	0.333333	DSC 2	49.0187
Cp		422.765	49.4324	0.333333	DSC 2	49.0311
Cp		423.252	49.4417	0.333333	DSC 2	49.0434
Cp		423.739	49.4497	0.333333	DSC 2	49.0557
Cp		424.226	49.4571	0.333333	DSC 2	49.068
Cp		424.712	49.4638	0.333333	DSC 2	49.0802
Cp		425.199	49.4698	0.333333	DSC 2	49.0924
Cp		425.686	49.4779	0.333333	DSC 2	49.1045
Cp		426.173	49.4873	0.333333	DSC 2	49.1167
Cp		426.66	49.4972	0.333333	DSC 2	49.1287
Cp		427.147	49.5055	0.333333	DSC 2	49.1408
Cp		427.633	49.5123	0.333333	DSC 2	49.1528
Cp		428.12	49.5186	0.333333	DSC 2	49.1648
Cp		428.607	49.5254	0.333333	DSC 2	49.1768
Cp		429.094	49.5331	0.333333	DSC 2	49.1887
Cp		429.581	49.5404	0.333333	DSC 2	49.2006
Cp		430.068	49.5466	0.333333	DSC 2	49.2124
Cp		430.554	49.5518	0.333333	DSC 2	49.2242
Cp		431.041	49.556	0.333333	DSC 2	49.236
Cp		431.528	49.5592	0.333333	DSC 2	49.2478
Cp		432.015	49.5616	0.333333	DSC 2	49.2595
Cp		432.502	49.5651	0.333333	DSC 2	49.2712
Cp		432.989	49.5708	0.333333	DSC 2	49.2828
Cp		433.476	49.578	0.333333	DSC 2	49.2944
Cp		433.962	49.5849	0.333333	DSC 2	49.306
Cp		434.449	49.5897	0.333333	DSC 2	49.3176
Cp		434.936	49.5932	0.333333	DSC 2	49.3291
Cp		435.423	49.598	0.333333	DSC 2	49.3406
Cp		435.91	49.6046	0.333333	DSC 2	49.3521
Cp		436.397	49.6128	0.333333	DSC 2	49.3635
Cp		436.883	49.6215	0.333333	DSC 2	49.3749
Cp		437.37	49.6284	0.333333	DSC 2	49.3862
Cp		437.857	49.6348	0.333333	DSC 2	49.3976
Cp		438.344	49.6393	0.333333	DSC 2	49.4089
Cp		438.831	49.6434	0.333333	DSC 2	49.4201
Cp		439.318	49.6488	0.333333	DSC 2	49.4314
Cp		439.804	49.6567	0.333333	DSC 2	49.4426
Cp		440.291	49.6658	0.335601	DSC 2	49.4538
Cp		440.778	49.6743	0.335601	DSC 2	49.4649
Cp		441.265	49.6816	0.335601	DSC 2	49.476
Cp		441.752	49.6874	0.335601	DSC 2	49.4871
Cp		442.239	49.6917	0.335601	DSC 2	49.4982
Cp		442.725	49.696	0.335601	DSC 2	49.5092
Cp		443.212	49.7018	0.335601	DSC 2	49.5202
Cp		443.699	49.7089	0.335601	DSC 2	49.5311
Cp		444.186	49.7161	0.335601	DSC 2	49.5421
Cp		444.673	49.7221	0.335601	DSC 2	49.553
Cp		445.16	49.727	0.335601	DSC 2	49.5638
Cp		445.646	49.7315	0.335601	DSC 2	49.5747
Cp		446.133	49.7367	0.335601	DSC 2	49.5855
Cp		446.62	49.743	0.335601	DSC 2	49.5963
Cp		447.107	49.7514	0.335601	DSC 2	49.607
Cp		447.594	49.7606	0.335601	DSC 2	49.6177
Cp		448.081	49.7694	0.335601	DSC 2	49.6284
Cp		448.567	49.7778	0.335601	DSC 2	49.6391
Cp		449.054	49.7852	0.335601	DSC 2	49.6497
Cp		449.541	49.7916	0.335601	DSC 2	49.6603
Cp		450.028	49.7989	0.335601	DSC 2	49.6709
Cp		450.515	49.8089	0.335601	DSC 2	49.6815
Cp		451.002	49.8197	0.335601	DSC 2	49.692
Cp		451.488	49.83	0.335601	DSC 2	49.7025
Cp		451.975	49.8376	0.335601	DSC 2	49.7129
Cp		452.462	49.8442	0.335601	DSC 2	49.7234
Cp		452.949	49.8513	0.335601	DSC 2	49.7338
Cp		453.436	49.859	0.335601	DSC 2	49.7442
Cp		453.923	49.868	0.335601	DSC 2	49.7545
Cp		454.41	49.8786	0.335601	DSC 2	49.7648
Cp		454.896	49.8891	0.335601	DSC 2	49.7751
Cp		455.383	49.8983	0.335601	DSC 2	49.7854
Cp		455.87	49.9051	0.335601	DSC 2	49.7956
Cp		456.357	49.9115	0.335601	DSC 2	49.8058
Cp		456.844	49.9187	0.335601	DSC 2	49.816
Cp		457.331	49.928	0.335601	DSC 2	49.8262
Cp		457.817	49.9385	0.335601	DSC 2	49.8363
Cp		458.304	49.9483	0.335601	DSC 2	49.8464
Cp		458.791	49.9571	0.335601	DSC 2	49.8565
Cp		459.278	49.9648	0.335601	DSC 2	49.8665
Cp		459.765	49.9706	0.335601	DSC 2	49.8765
Cp		460.252	49.9766	0.335601	DSC 2	49.8865
Cp		460.738	49.9841	0.335601	DSC 2	49.8965
Cp		461.225	49.9927	0.335601	DSC 2	49.9064
Cp		461.712	50.0019	0.335601	DSC 2	49.9163
Cp		462.199	50.0107	0.335601	DSC 2	49.9262
Cp		462.686	50.0178	0.335601	DSC 2	49.9361
Cp		463.173	50.0239	0.335601	DSC 2	49.9459
Cp		463.659	50.0285	0.335601	DSC 2	49.9557
Cp		464.146	50.0332	0.335601	DSC 2	49.9655
Cp		464.633	50.0398	0.335601	DSC 2	49.9753
Cp		465.12	50.0482	0.335601	DSC 2	49.985
Cp		465.607	50.056	0.335601	DSC 2	49.9947
Cp		466.094	50.0626	0.335601	DSC 2	50.0044
Cp		466.58	50.0682	0.335601	DSC 2	50.014
Cp		467.067	50.0731	0.335601	DSC 2	50.0236
Cp		467.554	50.0788	0.335601	DSC 2	50.0332
Cp		468.041	50.0864	0.335601	DSC 2	50.0428
Cp		468.528	50.0939	0.335601	DSC 2	50.0524
Cp		469.015	50.1004	0.335601	DSC 2	50.0619
Cp		469.501	50.1059	0.335601	DSC 2	50.0714
Cp		469.988	50.1114	0.335601	DSC 2	50.0809
Cp		470.475	50.1156	0.335601	DSC 2	50.0903
Cp		470.962	50.12	0.335601	DSC 2	50.0997
Cp		471.449	50.1253	0.335601	DSC 2	50.1091
Cp		471.936	50.1327	0.335601	DSC 2	50.1185
Cp		472.422	50.1416	0.335601	DSC 2	50.1279
Cp		472.909	50.1495	0.335601	DSC 2	50.1372
Cp		473.396	50.1558	0.335601	DSC 2	50.1465
Cp		473.883	50.1614	0.335601	DSC 2	50.1558
Cp		474.37	50.1673	0.335601	DSC 2	50.165
Cp		474.857	50.1745	0.335601	DSC 2	50.1742
Cp		475.344	50.1831	0.335601	DSC 2	50.1834
Cp		475.83	50.1925	0.335601	DSC 2	50.1926
Cp		476.317	50.2001	0.335601	DSC 2	50.2018
Cp		476.804	50.2069	0.335601	DSC 2	50.2109
Cp		477.291	50.2126	0.335601	DSC 2	50.22
Cp		477.778	50.2174	0.335601	DSC 2	50.2291
Cp		478.265	50.2229	0.335601	DSC 2	50.2381
Cp		478.751	50.2296	0.335601	DSC 2	50.2472
Cp		479.238	50.2373	0.335601	DSC 2	50.2562
Cp		479.725	50.2455	0.335601	DSC 2	50.2652
Cp		480.212	50.2525	0.335601	DSC 2	50.2741
Cp		480.699	50.2591	0.335601	DSC 2	50.2831
Cp		481.186	50.266	0.335601	DSC 2	50.292
Cp		481.672	50.2735	0.335601	DSC 2	50.3009
Cp		482.159	50.2815	0.335601	DSC 2	50.3098
Cp		482.646	50.2902	0.335601	DSC 2	50.3186
Cp		483.133	50.2991	0.335601	DSC 2	50.3274
Cp		483.62	50.3066	0.335601	DSC 2	50.3362
Cp		484.107	50.3128	0.335601	DSC 2	50.345
Cp		484.593	50.3193	0.335601	DSC 2	50.3538
Cp		485.08	50.3262	0.335601	DSC 2	50.3625
Cp		485.567	50.334	0.335601	DSC 2	50.3712
Cp		486.054	50.343	0.335601	DSC 2	50.3799
Cp		486.541	50.3522	0.335601	DSC 2	50.3886
Cp		487.028	50.361	0.335601	DSC 2	50.3972
Cp		487.514	50.3684	0.335601	DSC 2	50.4058
Cp		488.001	50.3753	0.335601	DSC 2	50.4145
Cp		488.488	50.3816	0.335601	DSC 2	50.423
Cp		488.975	50.3896	0.335601	DSC 2	50.4316
Cp		489.462	50.3991	0.335601	DSC 2	50.4401
Cp		489.949	50.409	0.335601	DSC 2	50.4486
Cp		490.435	50.4191	0.335601	DSC 2	50.4571
Cp		490.922	50.4282	0.335601	DSC 2	50.4656
Cp		491.409	50.4368	0.335601	DSC 2	50.474
Cp		491.896	50.4447	0.335601	DSC 2	50.4825
Cp		492.383	50.4531	0.335601	DSC 2	50.4909
Cp		492.87	50.4627	0.335601	DSC 2	50.4993
Cp		493.356	50.4723	0.335601	DSC 2	50.5076
Cp		493.843	50.4816	0.335601	DSC 2	50.516
Cp		494.33	50.4894	0.335601	DSC 2	50.5243
Cp		494.817	50.4959	0.335601	DSC 2	50.5326
Cp		495.304	50.5017	0.335601	DSC 2	50.5408
Cp		495.791	50.508	0.335601	DSC 2	50.5491
Cp		496.278	50.5155	0.335601	DSC 2	50.5573
Cp		496.764	50.5249	0.335601	DSC 2	50.5655
Cp		497.251	50.534	0.335601	DSC 2	50.5737
Cp		497.738	50.5423	0.335601	DSC 2	50.5819
Cp		498.225	50.5498	0.335601	DSC 2	50.5901
Cp		498.712	50.5565	0.335601	DSC 2	50.5982
Cp		499.199	50.5632	0.335601	DSC 2	50.6063
Cp		499.685	50.571	0.335601	DSC 2	50.6144
Cp		500.172	50.58	0.335601	DSC 2	50.6225
Cp		500.659	50.5887	0.335601	DSC 2	50.6305
Cp		501.146	50.5955	0.335601	DSC 2	50.6385
Cp		501.633	50.6016	0.335601	DSC 2	50.6465
Cp		502.12	50.6075	0.335601	DSC 2	50.6545
Cp		502.606	50.6129	0.335601	DSC 2	50.6625
Cp		503.093	50.6191	0.335601	DSC 2	50.6704
Cp		503.58	50.627	0.335601	DSC 2	50.6784
Cp		504.067	50.6356	0.335601	DSC 2	50.6863
Cp		504.554	50.6426	0.335601	DSC 2	50.6942
Cp		505.041	50.6486	0.335601	DSC 2	50.702
Cp		505.527	50.6539	0.335601	DSC 2	50.7099
Cp		506.014	50.6587	0.335601	DSC 2	50.7177
Cp		506.501	50.6645	0.335601	DSC 2	50.7255
Cp		506.988	50.6719	0.335601	DSC 2	50.7333
Cp		507.475	50.6801	0.335601	DSC 2	50.7411
Cp		507.962	50.6872	0.335601	DSC 2	50.7488
Cp		508.448	50.6931	0.335601	DSC 2	50.7566
Cp		508.935	50.6986	0.335601	DSC 2	50.7643
Cp		509.422	50.7045	0.335601	DSC 2	50.772
Cp		509.909	50.7102	0.335601	DSC 2	50.7796
Cp		510.396	50.7173	0.335601	DSC 2	50.7873
Cp		510.883	50.7252	0.335601	DSC 2	50.7949
Cp		511.369	50.7323	0.335601	DSC 2	50.8025
Cp		511.856	50.738	0.335601	DSC 2	50.8101
Cp		512.343	50.7424	0.335601	DSC 2	50.8177
Cp		512.83	50.7463	0.333333	DSC 2	50.8253
Cp		513.317	50.7508	0.333333	DSC 2	50.8328
Cp		513.804	50.7568	0.333333	DSC 2	50.8403
Cp		514.291	50.7632	0.333333	DSC 2	50.8478
Cp		514.777	50.7695	0.333333	DSC 2	50.8553
Cp		515.264	50.775	0.333333	DSC 2	50.8628
Cp		515.751	50.7805	0.333333	DSC 2	50.8702
Cp		516.238	50.7854	0.333333	DSC 2	50.8777
Cp		516.725	50.7896	0.333333	DSC 2	50.8851
Cp		517.212	50.7933	0.333333	DSC 2	50.8925
Cp		517.698	50.799	0.333333	DSC 2	50.8999
Cp		518.185	50.8056	0.333333	DSC 2	50.9072
Cp		518.672	50.8125	0.333333	DSC 2	50.9146
Cp		519.159	50.819	0.333333	DSC 2	50.9219
Cp		519.646	50.8246	0.333333	DSC 2	50.9292
Cp		520.133	50.8296	0.333333	DSC 2	50.9365
Cp		520.619	50.8346	0.333333	DSC 2	50.9437
Cp		521.106	50.8409	0.333333	DSC 2	50.951
Cp		521.593	50.8477	0.333333	DSC 2	50.9582
Cp		522.08	50.8544	0.333333	DSC 2	50.9654
Cp		522.567	50.8599	0.333333	DSC 2	50.9726
Cp		523.054	50.8644	0.333333	DSC 2	50.9798
Cp		523.54	50.8685	0.333333	DSC 2	50.987
Cp		524.027	50.8724	0.333333	DSC 2	50.9941
Cp		524.514	50.8764	0.333333	DSC 2	51.0012
Cp		525.001	50.8819	0.333333	DSC 2	51.0083
Cp		525.488	50.8883	0.333333	DSC 2	51.0154
Cp		525.975	50.8955	0.333333	DSC 2	51.0225
Cp		526.461	50.8984	0.333333	DSC 2	51.0296
Cp		526.948	50.9069	0.333333	DSC 2	51.0366
Cp		527.435	50.9103	0.333333	DSC 2	51.0436
Cp		527.922	50.9144	0.333333	DSC 2	51.0506
Cp		528.409	50.9203	0.333333	DSC 2	51.0576
Cp		528.896	50.9265	0.333333	DSC 2	51.0646
Cp		529.382	50.9321	0.333333	DSC 2	51.0715
Cp		529.869	50.937	0.333333	DSC 2	51.0785
Cp		530.356	50.9416	0.333333	DSC 2	51.0854
Cp		530.843	50.9473	0.333333	DSC 2	51.0923
Cp		531.33	50.954	0.333333	DSC 2	51.0992
Cp		531.817	50.9612	0.333333	DSC 2	51.1061
Cp		532.303	50.9678	0.333333	DSC 2	51.1129
Cp		532.79	50.9737	0.333333	DSC 2	51.1198
Cp		533.277	50.9794	0.333333	DSC 2	51.1266
Cp		533.764	50.9851	0.333333	DSC 2	51.1334
Cp		534.251	50.9913	0.333333	DSC 2	51.1402
Cp		534.738	50.9993	0.333333	DSC 2	51.1469
Cp		535.225	51.0092	0.333333	DSC 2	51.1537
Cp		535.711	51.018	0.333333	DSC 2	51.1604
Cp		536.198	51.0254	0.333333	DSC 2	51.1672
Cp		536.685	51.0312	0.333333	DSC 2	51.1739
Cp		537.172	51.0363	0.333333	DSC 2	51.1806
Cp		537.659	51.0386	0.333333	DSC 2	51.1872
Cp		538.146	51.0418	0.333333	DSC 2	51.1939
Cp		538.632	51.0493	0.333333	DSC 2	51.2005
Cp		539.119	51.0572	0.333333	DSC 2	51.2072
Cp		539.606	51.0646	0.333333	DSC 2	51.2138
Cp		540.093	51.0714	0.333333	DSC 2	51.2204
Cp		540.58	51.0774	0.333333	DSC 2	51.227
Cp		541.067	51.0827	0.333333	DSC 2	51.2335
Cp		541.553	51.0887	0.333333	DSC 2	51.2401
Cp		542.04	51.0988	0.333333	DSC 2	51.2466
Cp		542.527	51.1091	0.333333	DSC 2	51.2531
Cp		543.014	51.1181	0.333333	DSC 2	51.2596
Cp		543.501	51.1251	0.333333	DSC 2	51.2661
Cp		543.988	51.1311	0.333333	DSC 2	51.2726
Cp		544.474	51.1379	0.333333	DSC 2	51.2791
Cp		544.961	51.1453	0.333333	DSC 2	51.2855
Cp		545.448	51.1532	0.333333	DSC 2	51.2919
Cp		545.935	51.1619	0.333333	DSC 2	51.2983
Cp		546.422	51.1707	0.333333	DSC 2	51.3047
Cp		546.909	51.1774	0.333333	DSC 2	51.3111
Cp		547.395	51.1835	0.333333	DSC 2	51.3175
Cp		547.882	51.1892	0.333333	DSC 2	51.3238
Cp		548.369	51.1946	0.333333	DSC 2	51.3302
Cp		548.856	51.1998	0.333333	DSC 2	51.3365
Cp		549.343	51.2047	0.335601	DSC 2	51.3428
Cp		549.83	51.2084	0.335601	DSC 2	51.3491
Cp		550.316	51.2114	0.335601	DSC 2	51.3554
Cp		550.803	51.2141	0.335601	DSC 2	51.3616
Cp		551.29	51.217	0.335601	DSC 2	51.3679
Cp		551.777	51.2182	0.335601	DSC 2	51.3741
Cp		552.264	51.2192	0.335601	DSC 2	51.3803
Cp		552.751	51.2193	0.335601	DSC 2	51.3865
Cp		553.237	51.2193	0.335601	DSC 2	51.3927
Cp		553.724	51.2187	0.335601	DSC 2	51.3989
Cp		554.211	51.2181	0.335601	DSC 2	51.405
Cp		554.698	51.2176	0.335601	DSC 2	51.4112
Cp		555.185	51.2177	0.335601	DSC 2	51.4173
Cp		555.672	51.2195	0.335601	DSC 2	51.4234
Cp		556.159	51.2216	0.335601	DSC 2	51.4295
Cp		556.645	51.2246	0.335601	DSC 2	51.4356
Cp		557.132	51.2273	0.335601	DSC 2	51.4417
Cp		557.619	51.2296	0.335601	DSC 2	51.4478
Cp		558.106	51.2315	0.335601	DSC 2	51.4538
Cp		558.593	51.2349	0.335601	DSC 2	51.4598
Cp		559.08	51.2401	0.335601	DSC 2	51.4659
Cp		559.566	51.2468	0.335601	DSC 2	51.4719
Cp		560.053	51.2547	0.335601	DSC 2	51.4778
Cp		560.54	51.2623	0.335601	DSC 2	51.4838
Cp		561.027	51.2688	0.335601	DSC 2	51.4898
Cp		561.514	51.2748	0.335601	DSC 2	51.4957
Cp		562.001	51.2809	0.335601	DSC 2	51.5017
Cp		562.487	51.2884	0.335601	DSC 2	51.5076
Cp		562.974	51.2977	0.335601	DSC 2	51.5135
Cp		563.461	51.3064	0.335601	DSC 2	51.5194
Cp		563.948	51.3152	0.335601	DSC 2	51.5253
Cp		564.435	51.3232	0.335601	DSC 2	51.5311
Cp		564.922	51.3302	0.335601	DSC 2	51.537
Cp		565.408	51.3367	0.335601	DSC 2	51.5428
Cp		565.895	51.3431	0.335601	DSC 2	51.5487
Cp		566.382	51.3521	0.335601	DSC 2	51.5545
Cp		566.869	51.3636	0.335601	DSC 2	51.5603
Cp		567.356	51.3761	0.335601	DSC 2	51.5661
Cp		567.843	51.3886	0.335601	DSC 2	51.5718
Cp		568.329	51.4003	0.335601	DSC 2	51.5776
Cp		568.816	51.4116	0.335601	DSC 2	51.5833
Cp		569.303	51.4225	0.335601	DSC 2	51.5891
Cp		569.79	51.4308	0.335601	DSC 2	51.5948
Cp		570.277	51.4388	0.335601	DSC 2	51.6005
Cp		570.764	51.4469	0.335601	DSC 2	51.6062
Cp		571.25	51.4541	0.335601	DSC 2	51.6119
Cp		571.737	51.4594	0.335601	DSC 2	51.6175
Cp		572.224	51.4643	0.335601	DSC 2	51.6232
Cp		572.711	51.4692	0.335601	DSC 2	51.6288
Cp		573.198	51.4749	0.335601	DSC 2	51.6345
Cp		573.685	51.4825	0.335601	DSC 2	51.6401
Cp		574.172	51.4919	0.335601	DSC 2	51.6457
Cp		574.658	51.5039	0.335601	DSC 2	51.6513
Cp		575.145	51.512	0.335601	DSC 2	51.6569
Cp		575.632	51.5177	0.335601	DSC 2	51.6624
Cp		576.119	51.527	0.335601	DSC 2	51.668
Cp		576.606	51.5351	0.335601	DSC 2	51.6735
Cp		577.093	51.5437	0.335601	DSC 2	51.679
Cp		577.579	51.5525	0.335601	DSC 2	51.6846
Cp		578.066	51.5614	0.335601	DSC 2	51.6901
Cp		578.553	51.5688	0.335601	DSC 2	51.6956
Cp		579.04	51.5748	0.335601	DSC 2	51.701
Cp		579.527	51.5781	0.335601	DSC 2	51.7065
Cp		580.014	51.5835	0.335601	DSC 2	51.712
Cp		580.5	51.5898	0.335601	DSC 2	51.7174
Cp		580.987	51.5973	0.335601	DSC 2	51.7228
Cp		581.474	51.6056	0.335601	DSC 2	51.7282
Cp		581.961	51.6109	0.335601	DSC 2	51.7336
Cp		582.448	51.6137	0.335601	DSC 2	51.739
Cp		582.935	51.6172	0.335601	DSC 2	51.7444
Cp		583.421	51.6239	0.335601	DSC 2	51.7498
Cp		583.908	51.631	0.335601	DSC 2	51.7551
Cp		584.395	51.6393	0.335601	DSC 2	51.7605
Cp		584.882	51.648	0.335601	DSC 2	51.7658
Cp		585.369	51.6558	0.333333	DSC 2	51.7711
Cp		585.856	51.659	0.333333	DSC 2	51.7764
Cp		586.342	51.6652	0.333333	DSC 2	51.7817
Cp		586.829	51.6706	0.333333	DSC 2	51.787
Cp		587.316	51.6765	0.333333	DSC 2	51.7923
Cp		587.803	51.6829	0.333333	DSC 2	51.7976
Cp		588.29	51.689	0.333333	DSC 2	51.8028
Cp		588.777	51.6943	0.333333	DSC 2	51.8081
Cp		589.263	51.6979	0.333333	DSC 2	51.8133
Cp		589.75	51.701	0.333333	DSC 2	51.8185
Cp		590.237	51.704	0.333333	DSC 2	51.8237
Cp		590.724	51.709	0.333333	DSC 2	51.8289
Cp		591.211	51.7141	0.333333	DSC 2	51.8341
Cp		591.698	51.7235	0.333333	DSC 2	51.8392
Cp		592.184	51.7315	0.333333	DSC 2	51.8444
Cp		592.671	51.7376	0.333333	DSC 2	51.8495
Cp		593.158	51.7429	0.333333	DSC 2	51.8547
Cp		593.645	51.7479	0.333333	DSC 2	51.8598
Cp		594.132	51.7541	0.333333	DSC 2	51.8649
Cp		594.619	51.7624	0.333333	DSC 2	51.87
Cp		595.106	51.7707	0.333333	DSC 2	51.8751
Cp		595.592	51.7773	0.333333	DSC 2	51.8802
Cp		596.079	51.782	0.333333	DSC 2	51.8852
Cp		596.566	51.7848	0.333333	DSC 2	51.8903
Cp		597.053	51.7871	0.333333	DSC 2	51.8953
Cp		597.54	51.7903	0.333333	DSC 2	51.9004
Cp		598.027	51.7958	0.333333	DSC 2	51.9054
Cp		598.513	51.8027	0.333333	DSC 2	51.9104
Cp		599	51.8113	0.333333	DSC 2	51.9154
Cp		599.487	51.8192	0.333333	DSC 2	51.9204
Cp		599.974	51.8248	0.333333	DSC 2	51.9254
Cp		600.461	51.8305	0.333333	DSC 2	51.9303
Cp		600.948	51.8372	0.333333	DSC 2	51.9353
Cp		601.434	51.8455	0.333333	DSC 2	51.9402
Cp		601.921	51.8565	0.333333	DSC 2	51.9452
Cp		602.408	51.8678	0.333333	DSC 2	51.9501
Cp		602.895	51.8754	0.333333	DSC 2	51.955
Cp		603.382	51.8802	0.333333	DSC 2	51.9599
Cp		603.869	51.8859	0.333333	DSC 2	51.9648
Cp		604.355	51.8926	0.333333	DSC 2	51.9697
Cp		604.842	51.8992	0.333333	DSC 2	51.9746
Cp		605.329	51.9061	0.333333	DSC 2	51.9794
Cp		605.816	51.9135	0.333333	DSC 2	51.9843
Cp		606.303	51.9215	0.333333	DSC 2	51.9891
Cp		606.79	51.9285	0.333333	DSC 2	51.9939
Cp		607.276	51.9331	0.333333	DSC 2	51.9988
Cp		607.763	51.9393	0.333333	DSC 2	52.0036
Cp		608.25	51.9472	0.333333	DSC 2	52.0084
Cp		608.737	51.9565	0.333333	DSC 2	52.0131
Cp		609.224	51.967	0.333333	DSC 2	52.0179
Cp		609.711	51.9785	0.333333	DSC 2	52.0227
Cp		610.197	51.9879	0.333333	DSC 2	52.0274
Cp		610.684	51.9965	0.333333	DSC 2	52.0322
Cp		611.171	52.0028	0.333333	DSC 2	52.0369
Cp		611.658	52.0061	0.333333	DSC 2	52.0416
Cp		612.145	52.0096	0.333333	DSC 2	52.0464
Cp		612.632	52.0158	0.333333	DSC 2	52.0511
Cp		613.119	52.0201	0.333333	DSC 2	52.0558
Cp		613.605	52.0211	0.333333	DSC 2	52.0604
Cp		614.092	52.0215	0.333333	DSC 2	52.0651
Cp		614.579	52.0248	0.333333	DSC 2	52.0698
Cp		615.066	52.0323	0.333333	DSC 2	52.0744
Cp		615.553	52.0458	0.333333	DSC 2	52.0791
Cp		616.04	52.064	0.333333	DSC 2	52.0837
Cp		616.526	52.0812	0.333333	DSC 2	52.0883
Cp		617.013	52.0941	0.333333	DSC 2	52.0929
Cp		617.5	52.1014	0.333333	DSC 2	52.0976
Cp		617.987	52.1054	0.333333	DSC 2	52.1021
Cp		618.474	52.1085	0.333333	DSC 2	52.1067
Cp		618.961	52.1107	0.333333	DSC 2	52.1113
Cp		619.447	52.1135	0.333333	DSC 2	52.1159
Cp		619.934	52.1169	0.333333	DSC 2	52.1204
[truncated: 173 more rows]

## Sheet: tabulated functions
T(K)	Cp(J/K)	H(J)	G(J)	S(J/K)	H-H298(J)
temperature in kelvins	isobaric heat capacity	enthalpy	Gibbs energy	absolute entropy (including the configurational entropy contribution)	enthalpy increment between T and 298.15 K
0	0	-317471	-317471	13.382	-7362.8
298.15	44.223	-310108	-326990	56.621	0
300	44.331	-310027	-327095	56.894	81.9
310	44.885	-309580	-327671	58.357	528
320	45.398	-309129	-328262	59.79	979.5
330	45.873	-308673	-328867	61.195	1435.9
340	46.315	-308212	-329486	62.571	1896.8
350	46.727	-307746	-330118	63.919	2362.1
360	47.111	-307277	-330764	65.241	2831.3
370	47.469	-306804	-331423	66.537	3304.2
380	47.806	-306328	-332095	67.807	3780.6
390	48.121	-305848	-332779	69.053	4260.2
400	48.417	-305366	-333476	70.275	4742.9
410	48.696	-304880	-334184	71.474	5228.5
420	48.959	-304392	-334905	72.651	5716.8
430	49.206	-303901	-335638	73.806	6207.6
440	49.44	-303408	-336381	74.94	6700.9
450	49.662	-302912	-337136	76.054	7196.4
460	49.871	-302414	-337902	77.147	7694.1
470	50.069	-301915	-338679	78.222	8193.8
480	50.258	-301413	-339467	79.278	8695.4
490	50.436	-300910	-340265	80.316	9198.9
500	50.606	-300404	-341073	81.337	9704.1
510	50.767	-299898	-341891	82.341	10211
520	50.921	-299389	-342720	83.328	10719.4
530	51.067	-298879	-343558	84.299	11229.4
540	51.206	-298368	-344406	85.255	11740.8
550	51.339	-297855	-345263	86.196	12253.5
560	51.466	-297341	-346129	87.122	12767.5
570	51.587	-296826	-347005	88.034	13282.8
580	51.702	-296309	-347890	88.932	13799.2
590	51.813	-295792	-348784	89.817	14316.8
600	51.918	-295273	-349686	90.689	14835.5
610	52.019	-294753	-350598	91.548	15355.2
620	52.116	-294233	-351517	92.395	15875.8
630	52.209	-293711	-352445	93.229	16397.5
640	52.297	-293188	-353382	94.052	16920
650	52.382	-292665	-354326	94.864	17443.4
660	52.464	-292141	-355279	95.664	17967.6
670	52.542	-291616	-356240	96.453	18492.7
680	52.617	-291090	-357208	97.232	19018.5
690	52.689	-290564	-358184	98.001	19545
700	52.759	-290036	-359168	98.76	20072.2
710	52.825	-289508	-360159	99.509	20600.2
720	52.889	-288980	-361158	100.248	21128.7
730	52.95	-288451	-362164	100.978	21657.9
740	53.01	-287921	-363178	101.699	22187.7
750	53.066	-287390	-364198	102.411	22718.1
760	53.121	-286860	-365226	103.114	23249.1
770	53.174	-286328	-366260	103.809	23780.5
780	53.224	-285796	-367302	104.495	24312.5
790	53.273	-285264	-368350	105.173	24845
800	53.32	-284730	-369406	105.844	25378
810	53.366	-284197	-370467	106.506	25911.4
820	53.409	-283663	-371536	107.161	26445.3
830	53.452	-283129	-372610	107.809	26979.6
840	53.492	-282594	-373692	108.449	27514.3
850	53.531	-282059	-374779	109.083	28049.4
860	53.569	-281524	-375873	109.709	28584.9
870	53.606	-280988	-376974	110.329	29120.8
880	53.641	-280452	-378080	110.941	29657.1
890	53.675	-279915	-379192	111.548	30193.6
900	53.708	-279378	-380311	112.148	30730.6
910	53.74	-278841	-381435	112.741	31267.8
920	53.771	-278303	-382566	113.329	31805.4
930	53.801	-277765	-383702	113.91	32343.2
940	53.83	-277227	-384844	114.486	32881.4
950	53.858	-276689	-385992	115.056	33419.8
960	53.885	-276150	-387145	115.62	33958.5
970	53.911	-275611	-388304	116.178	34497.5
980	53.937	-275072	-389468	116.731	35036.7
990	53.961	-274532	-390639	117.279	35576.2
1000	53.985	-273993	-391814	117.822	36116
1010	54.008	-273453	-392995	118.359	36655.9
1020	54.031	-272912	-394181	118.891	37196.1
1030	54.053	-272372	-395373	119.418	37736.6
1040	54.074	-271831	-396570	119.941	38277.2
1050	54.095	-271290	-397772	120.458	38818
1060	54.115	-270749	-398979	120.971	39359.1
1070	54.134	-270208	-400191	121.479	39900.3
1080	54.153	-269667	-401408	121.983	40441.8
1090	54.172	-269125	-402631	122.482	40983.4
1100	54.19	-268583	-403858	122.977	41525.2
1110	54.208	-268041	-405090	123.467	42067.2
1120	54.225	-267499	-406327	123.954	42609.4
1130	54.242	-266957	-407569	124.436	43151.7
1140	54.258	-266414	-408816	124.914	43694.2
1150	54.274	-265872	-410068	125.388	44236.9
1160	54.29	-265329	-411324	125.858	44779.7
1170	54.306	-264786	-412585	126.324	45322.7
1180	54.321	-264243	-413850	126.786	45865.8
1190	54.335	-263699	-415120	127.244	46409.1
1200	54.35	-263156	-416395	127.699	46952.5
1210	54.364	-262612	-417674	128.15	47496.1
1220	54.378	-262069	-418958	128.598	48039.8
1230	54.392	-261525	-420246	129.042	48583.6
1240	54.406	-260981	-421539	129.482	49127.6
1250	54.419	-260437	-422836	129.919	49671.7
1260	54.432	-259892	-424137	130.353	50216
1270	54.445	-259348	-425443	130.783	50760.4
1280	54.458	-258804	-426753	131.21	51304.9
1290	54.471	-258259	-428067	131.634	51849.6
1300	54.483	-257714	-429386	132.055	52394.3
1310	54.496	-257169	-430708	132.472	52939.2
1320	54.508	-256624	-432035	132.887	53484.2
1330	54.52	-256079	-433366	133.298	54029.4
1340	54.532	-255534	-434701	133.707	54574.6
1350	54.544	-254988	-436040	134.112	55120
1360	54.556	-254443	-437383	134.515	55665.5
1370	54.568	-253897	-438730	134.915	56211.1
1380	54.58	-253352	-440082	135.311	56756.9
1390	54.591	-252806	-441437	135.706	57302.7
1400	54.603	-252260	-442796	136.097	57848.7
1410	54.615	-251714	-444158	136.486	58394.8
1420	54.626	-251168	-445525	136.872	58941
